# Supplementary material for: N-Succinimidyl 3-((4-(4-[18F]fluorobutyl)-1H-1,2,3-triazol-1-yl)methyl)-5-(guanidinomethyl)benzoate ([18F]SFBTMGMB): a residualizing label for 18F-labeling of internalizing biomolecules
Source: Royal Society of Chemistry journal article supplement (doi:10.1039/c5ob02258d), 2015-12-01

## Electronic Supplementary Information

### ***N*-Succinimidyl 3-((4-(4-[<sup>18</sup>F]fluorobutyl)-1H-1,2,3-triazol-1-yl)methyl)-5-(guanidinomethyl)benzoate ([<sup>18</sup>F]SFBTMGMB): A Residualizing Label for <sup>18</sup>F-labeling of internalizing biomolecules**

Ganesan Vaidyanathan,<sup>a\*</sup> Darryl McDougald,<sup>a</sup> Jaeyeon Choi,<sup>a</sup> Marek Pruszyński,<sup>a,b</sup> Eftychia Koumariou,<sup>a</sup> Zhengyuan Zhou,<sup>a</sup> and Michael R. Zalutsky.<sup>a</sup>

<sup>a</sup>*Department of Radiology and Duke University Medical Center, Durham, North Carolina, USA;*

<sup>b</sup>*Present address: Institute of Nuclear Chemistry and Technology, Warsaw, Poland.*

For correspondence or reprints contact Ganesan Vaidyanathan, Box 3808, Department of Radiology, Duke University Medical Center, Durham, North Carolina 27710, USA. Telephone: (919) 684-7811; Fax (919) 684-7122. E-mail: [ganesan.v@duke.edu](mailto:ganesan.v@duke.edu).

## Table of Contents

|                                                                                                                                                           |           |
|-----------------------------------------------------------------------------------------------------------------------------------------------------------|-----------|
| 1. Experimental for the synthesis of 6-fluoro-hex-1-yne from hex-5-yn-1-yl 4-methylbenzenesulfonate: Formation of 6-(hex-5-yn-1-yloxy)hex-1-yne (12)..... | S3        |
| 2. Figure S1. Saturation binding curve obtained for [ <sup>125</sup> I]SGMIB-5F7 using BT474M1 cells.....                                                 | S4        |
| 3. <sup>1</sup> H and <sup>13</sup> C NMR spectra of new compounds.....                                                                                   | S5 - S24  |
| Compound 2.....                                                                                                                                           | S5 – S6   |
| Compound 3.....                                                                                                                                           | S7 – S8   |
| Compound 4.....                                                                                                                                           | S9 – S10  |
| Compound 5.....                                                                                                                                           | S11 – S12 |
| Compound 6.....                                                                                                                                           | S13 – S14 |
| Compound 7.....                                                                                                                                           | S15 – S16 |
| Compound 8.....                                                                                                                                           | S17 – S18 |
| Compound 9.....                                                                                                                                           | S19 – S20 |
| Compound 13.....                                                                                                                                          | S21 – S22 |
| Compound 14.....                                                                                                                                          | S23 – S24 |

**Formation of 6-(hex-5-yn-1-yloxy)hex-1-yne (12) during the synthesis of 6-fluoro-hex-1-yne from hex-5-yn-1-yl 4-methylbenzenesulfonate.** Potassium fluoride (1.73 g, 29.7 mmol) was added to a solution of hex-5-yn-1-yl 4-methylbenzenesulfonate (2.5 g, 9.91 mmol) in THF (100 mL) and the mixture was stirred at 50°C for 17 h. The reaction mixture was cooled to 20°C and partitioned between diethyl ether and water. The ethereal solution was dried over anhydrous sodium sulfate, filtered, and the filtrate concentrated to dryness by rotary evaporation. The residue was purified by silica gel chromatography using 5:1 hexanes:ethyl acetate as the mobile phase to afford 99 mg (10%) of 6-fluorohex-1-yne as a pale yellow oil and 605 mg (34%) of 6-(hex-5-yn-1-yloxy)hex-1-yne as a clear oil.

Figure S1. Saturation binding curve obtained for [ $^{125}$ I]SGMIB-5F7 using BT474M1 cells.

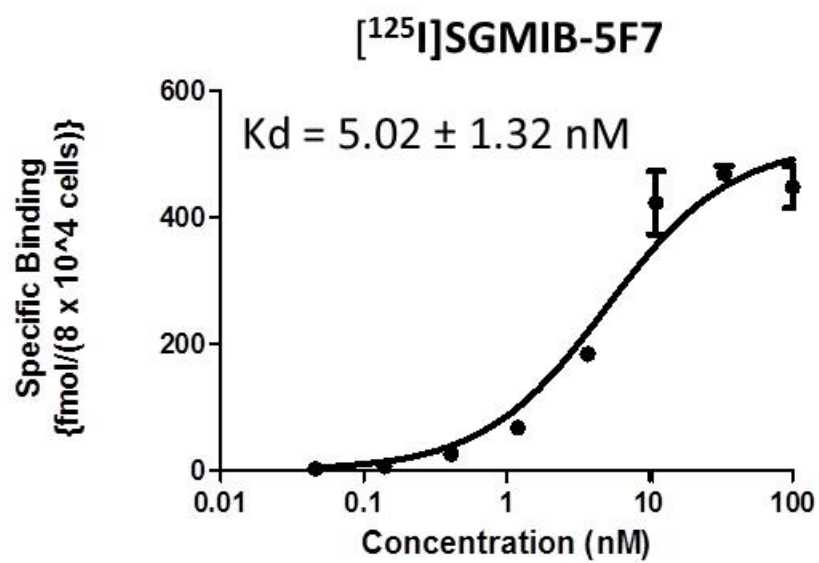

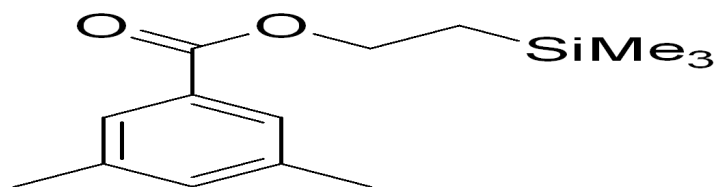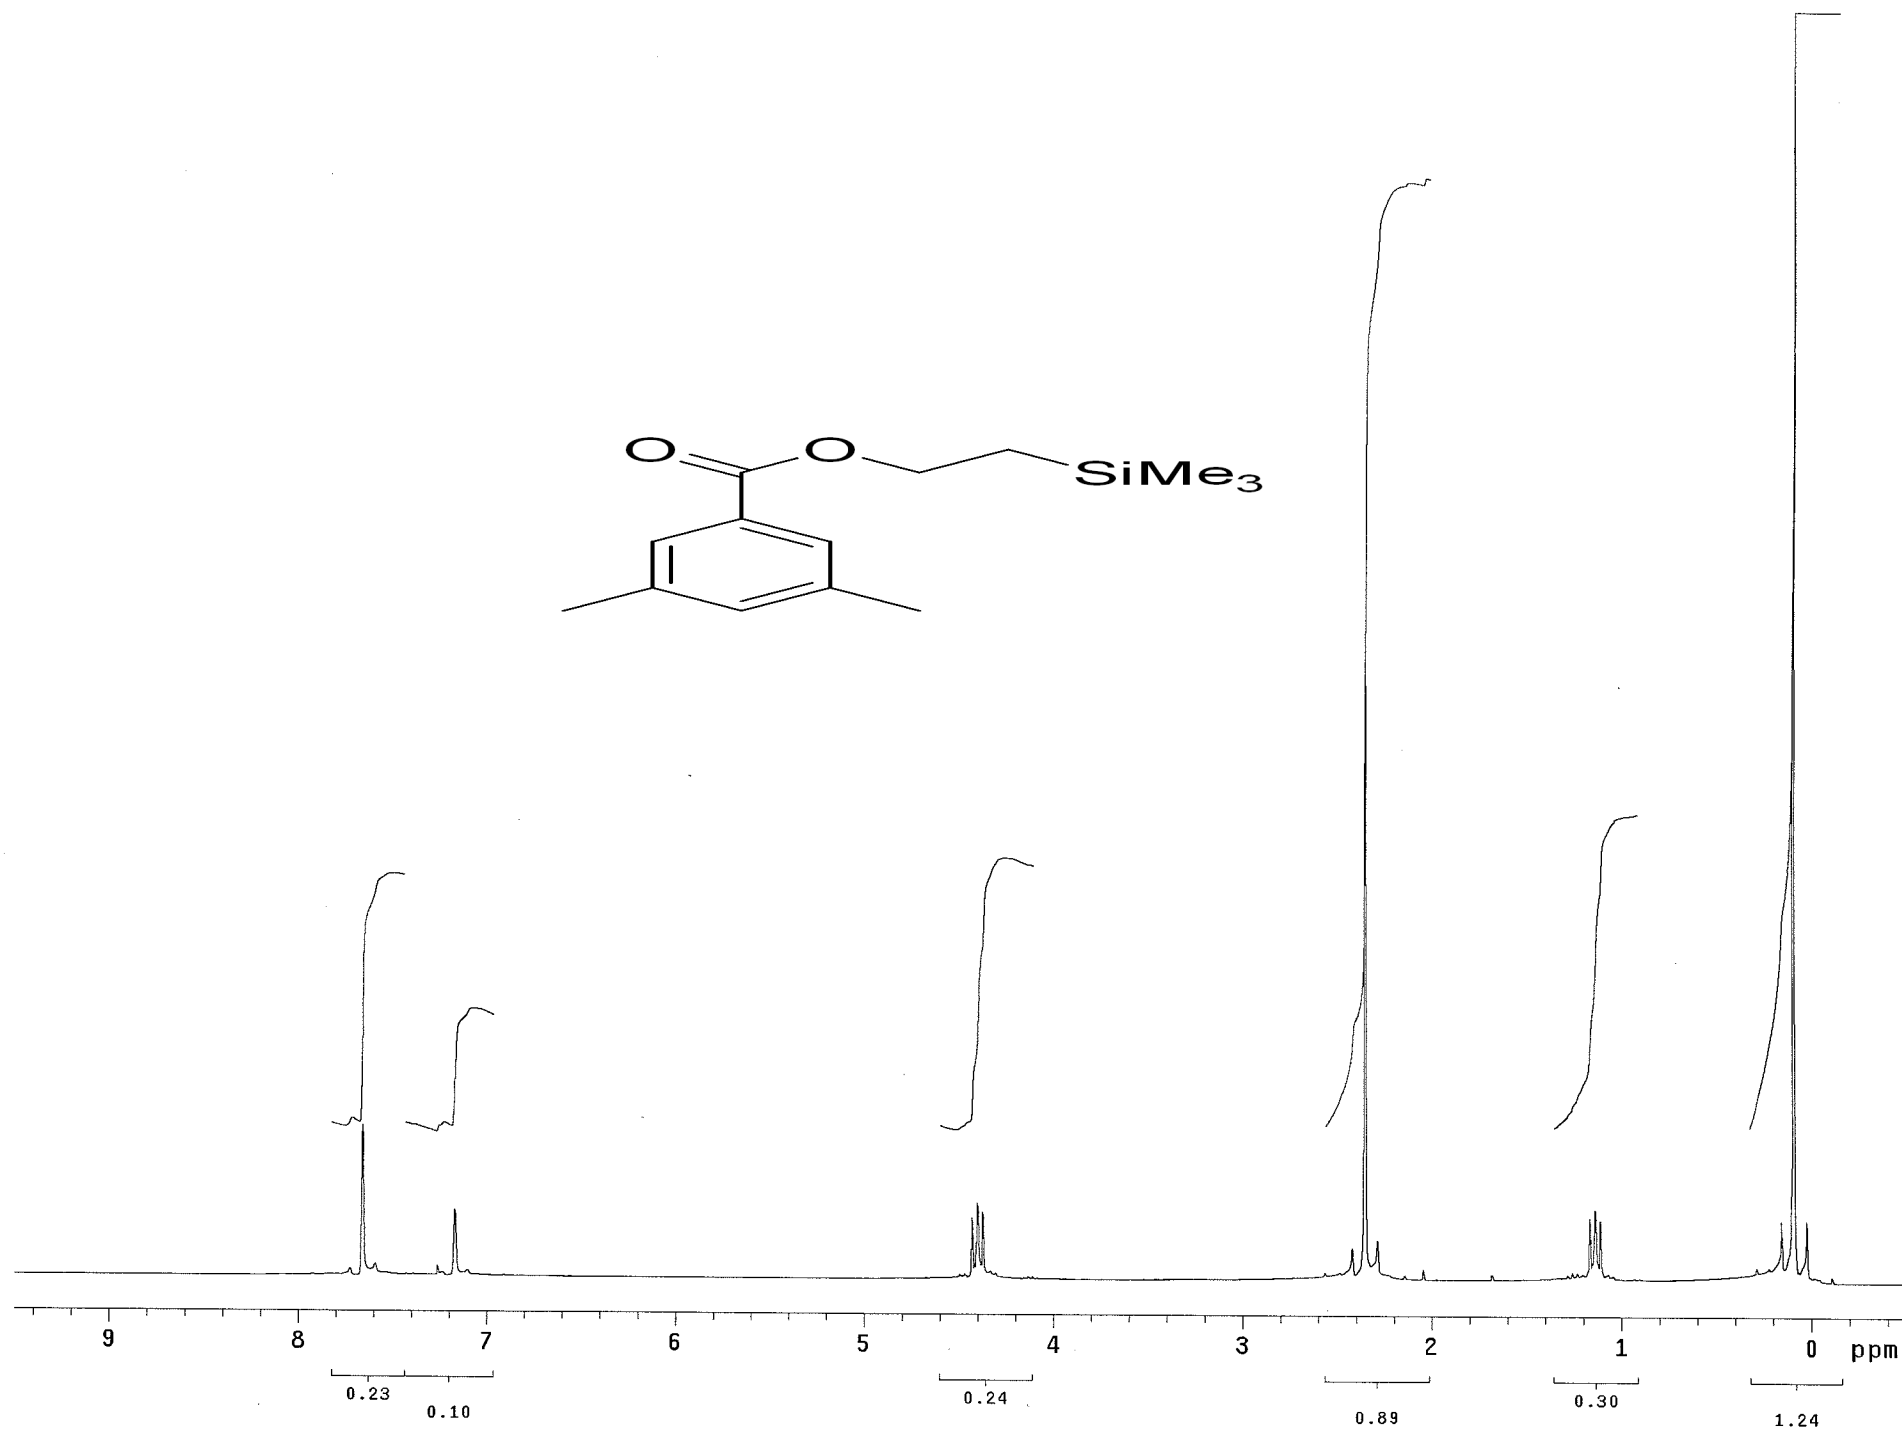

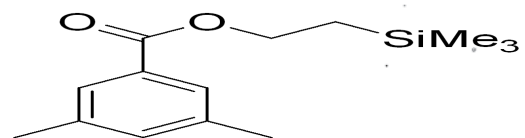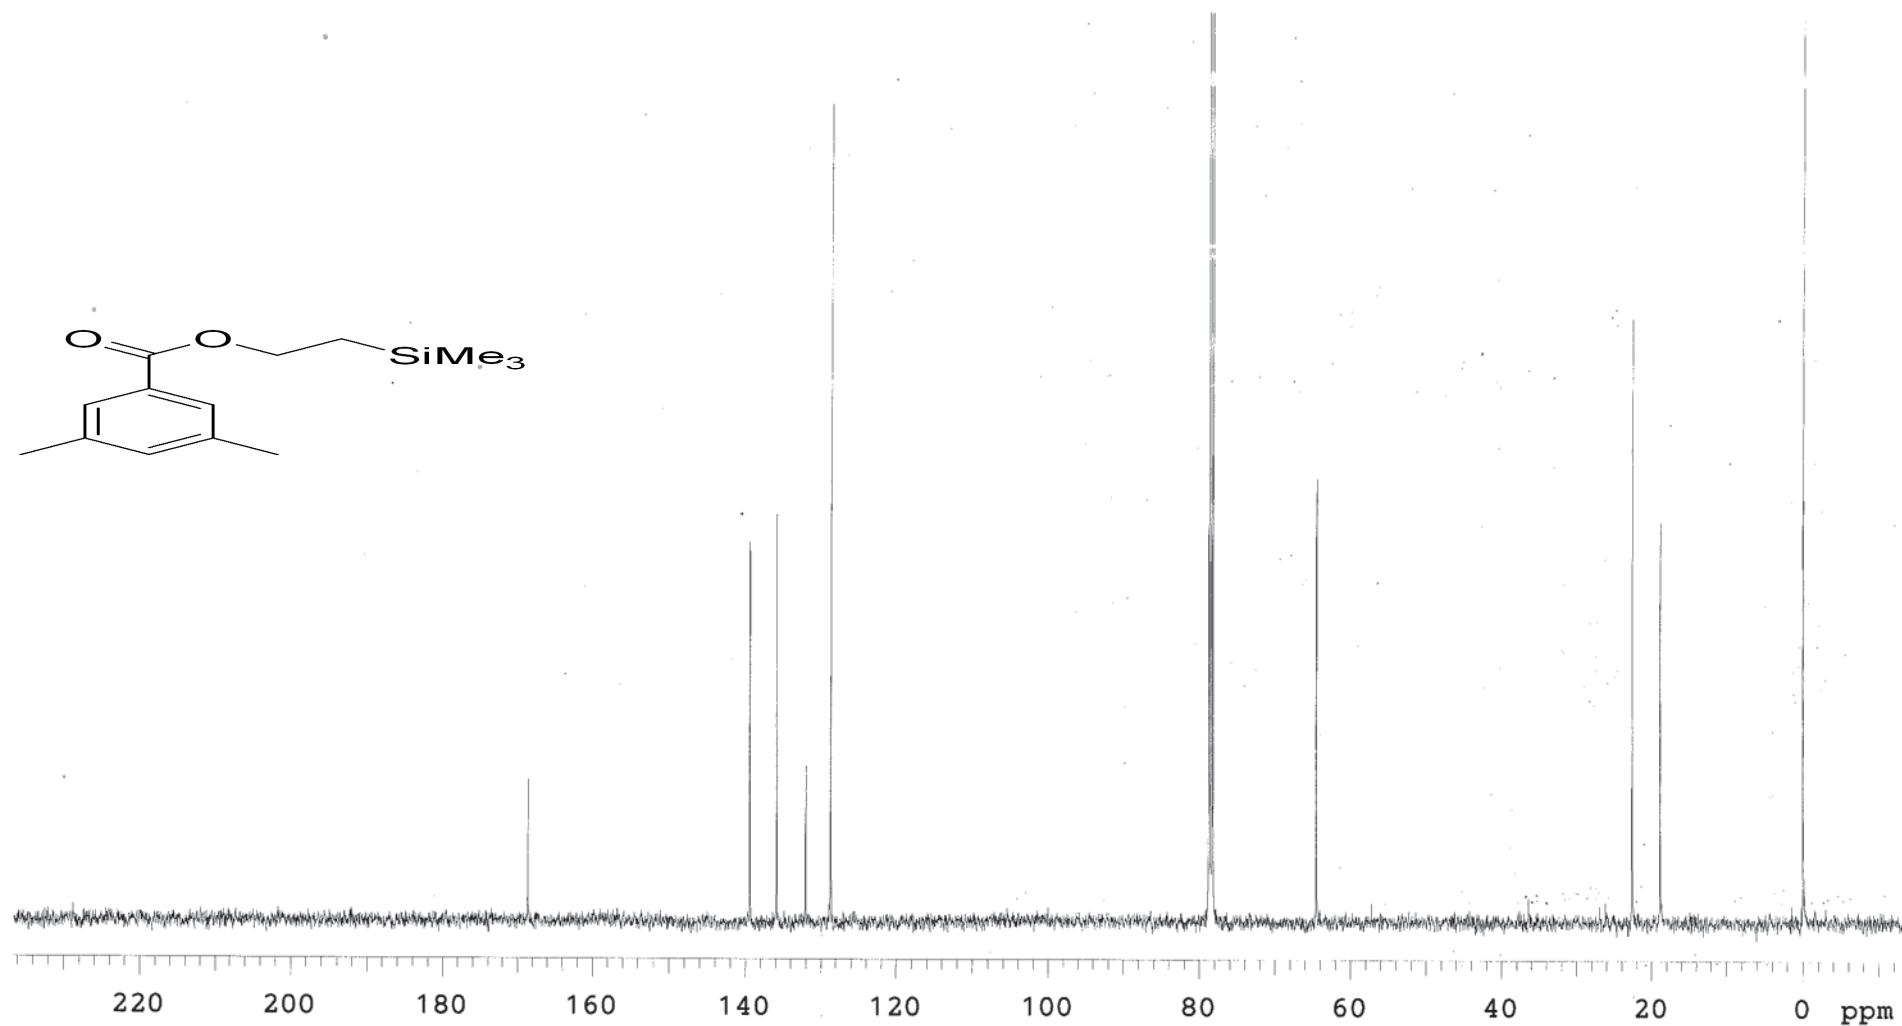

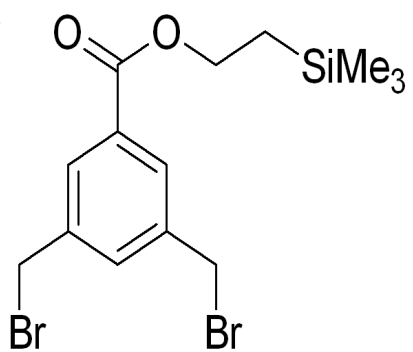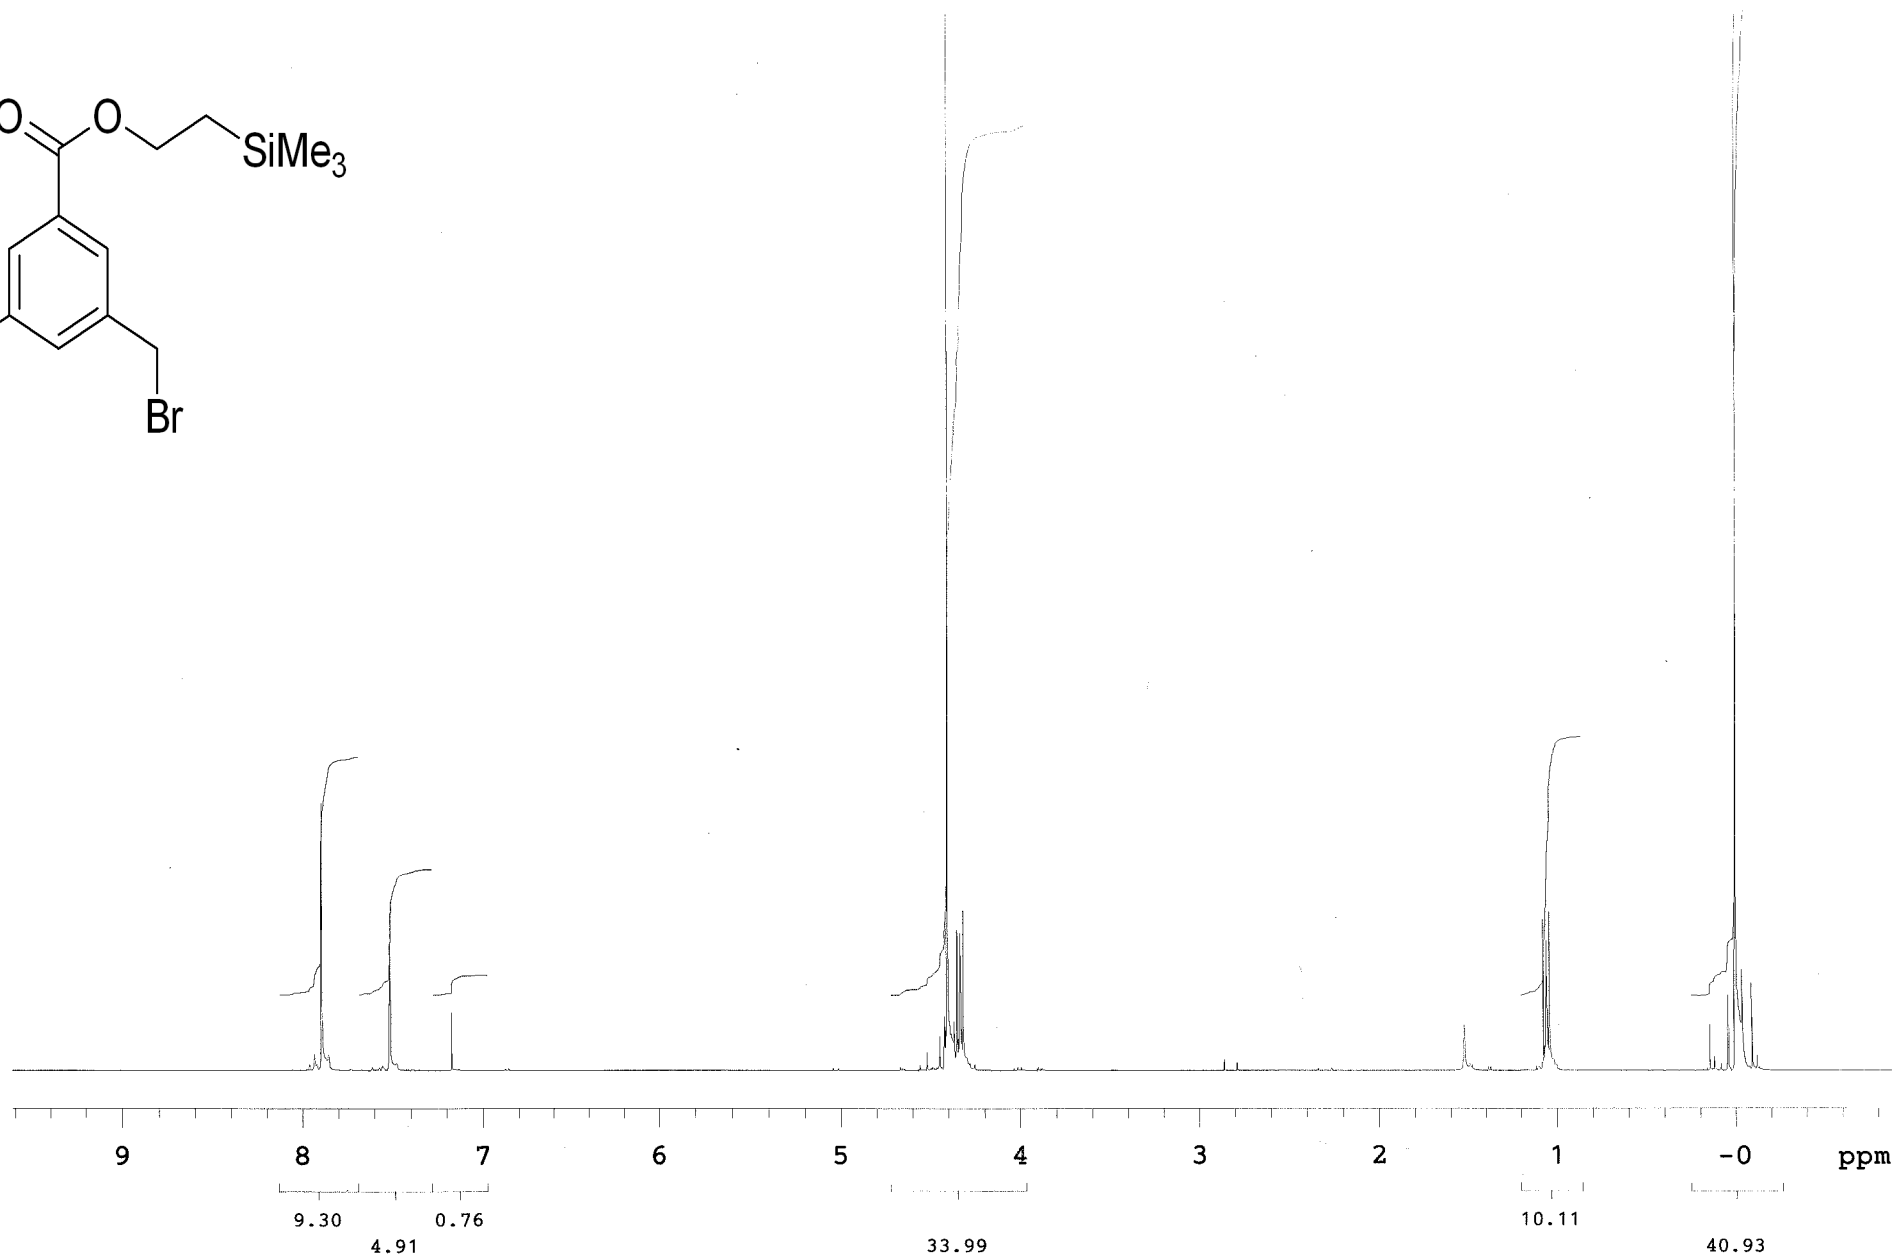

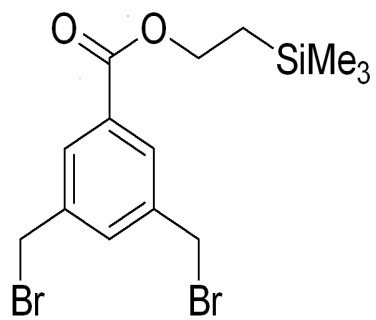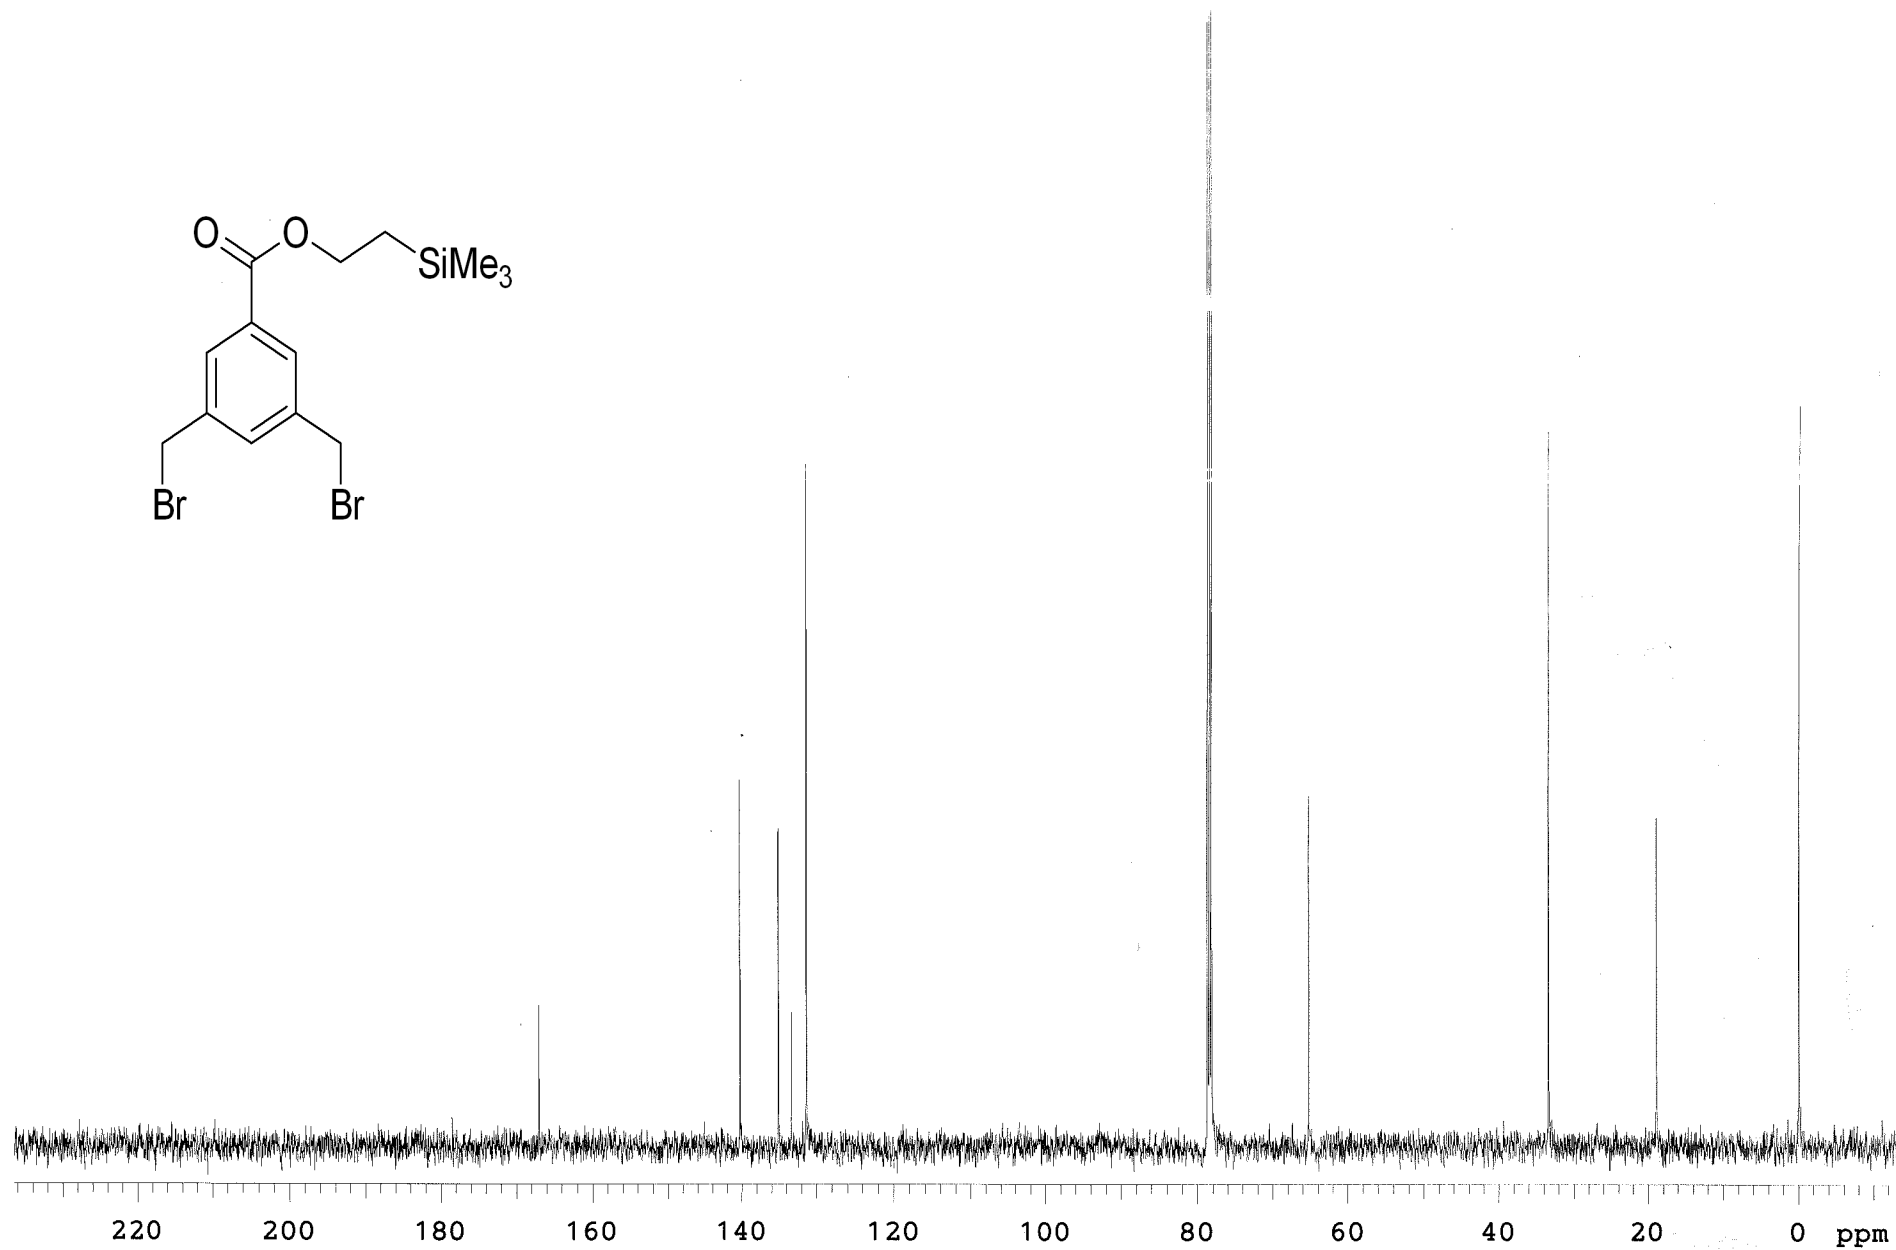



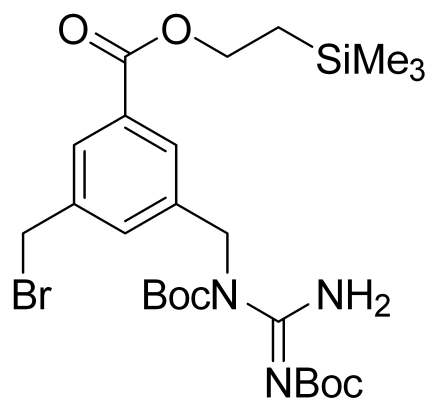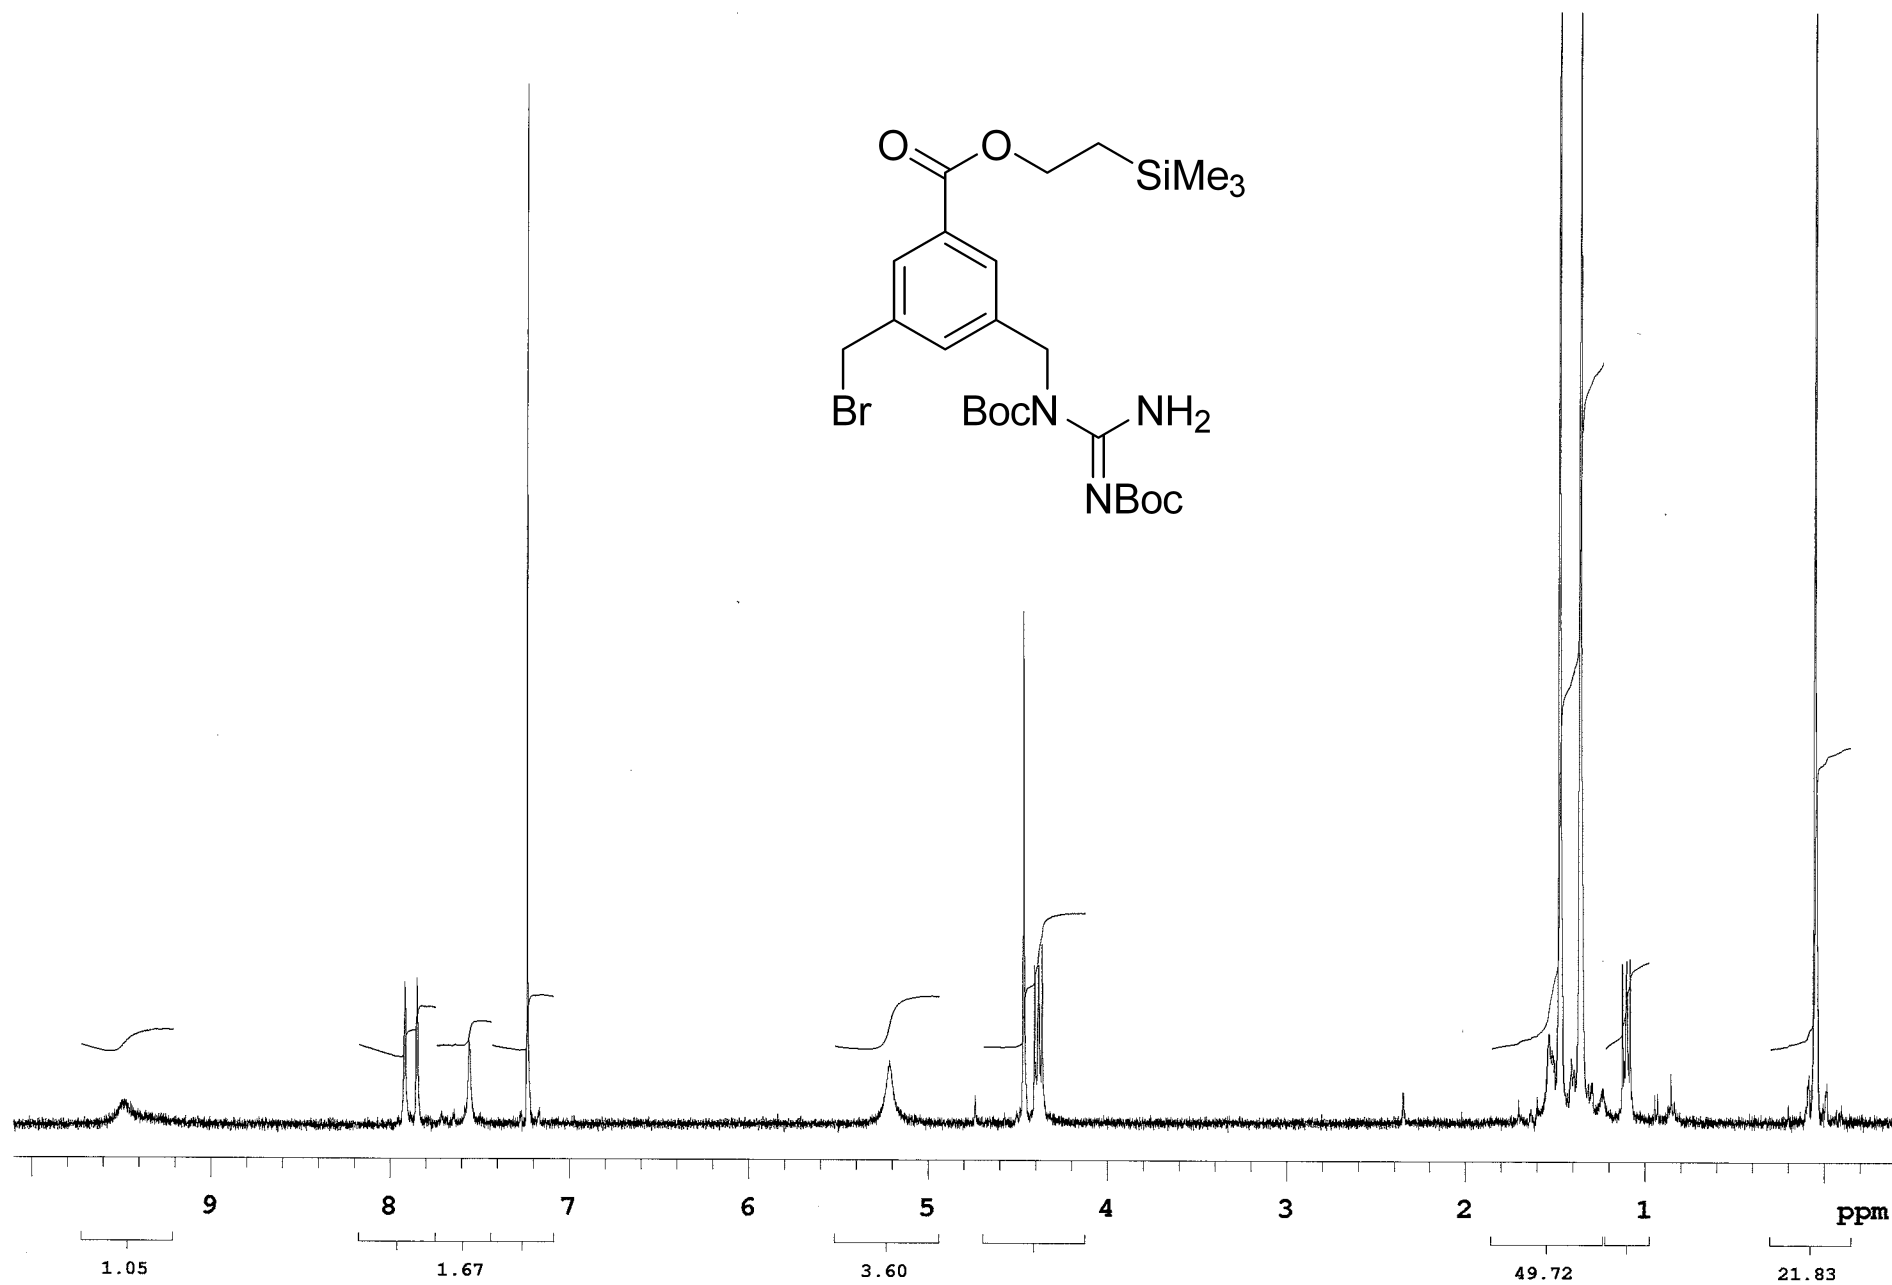

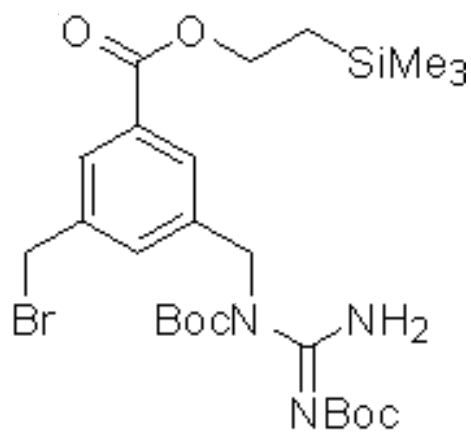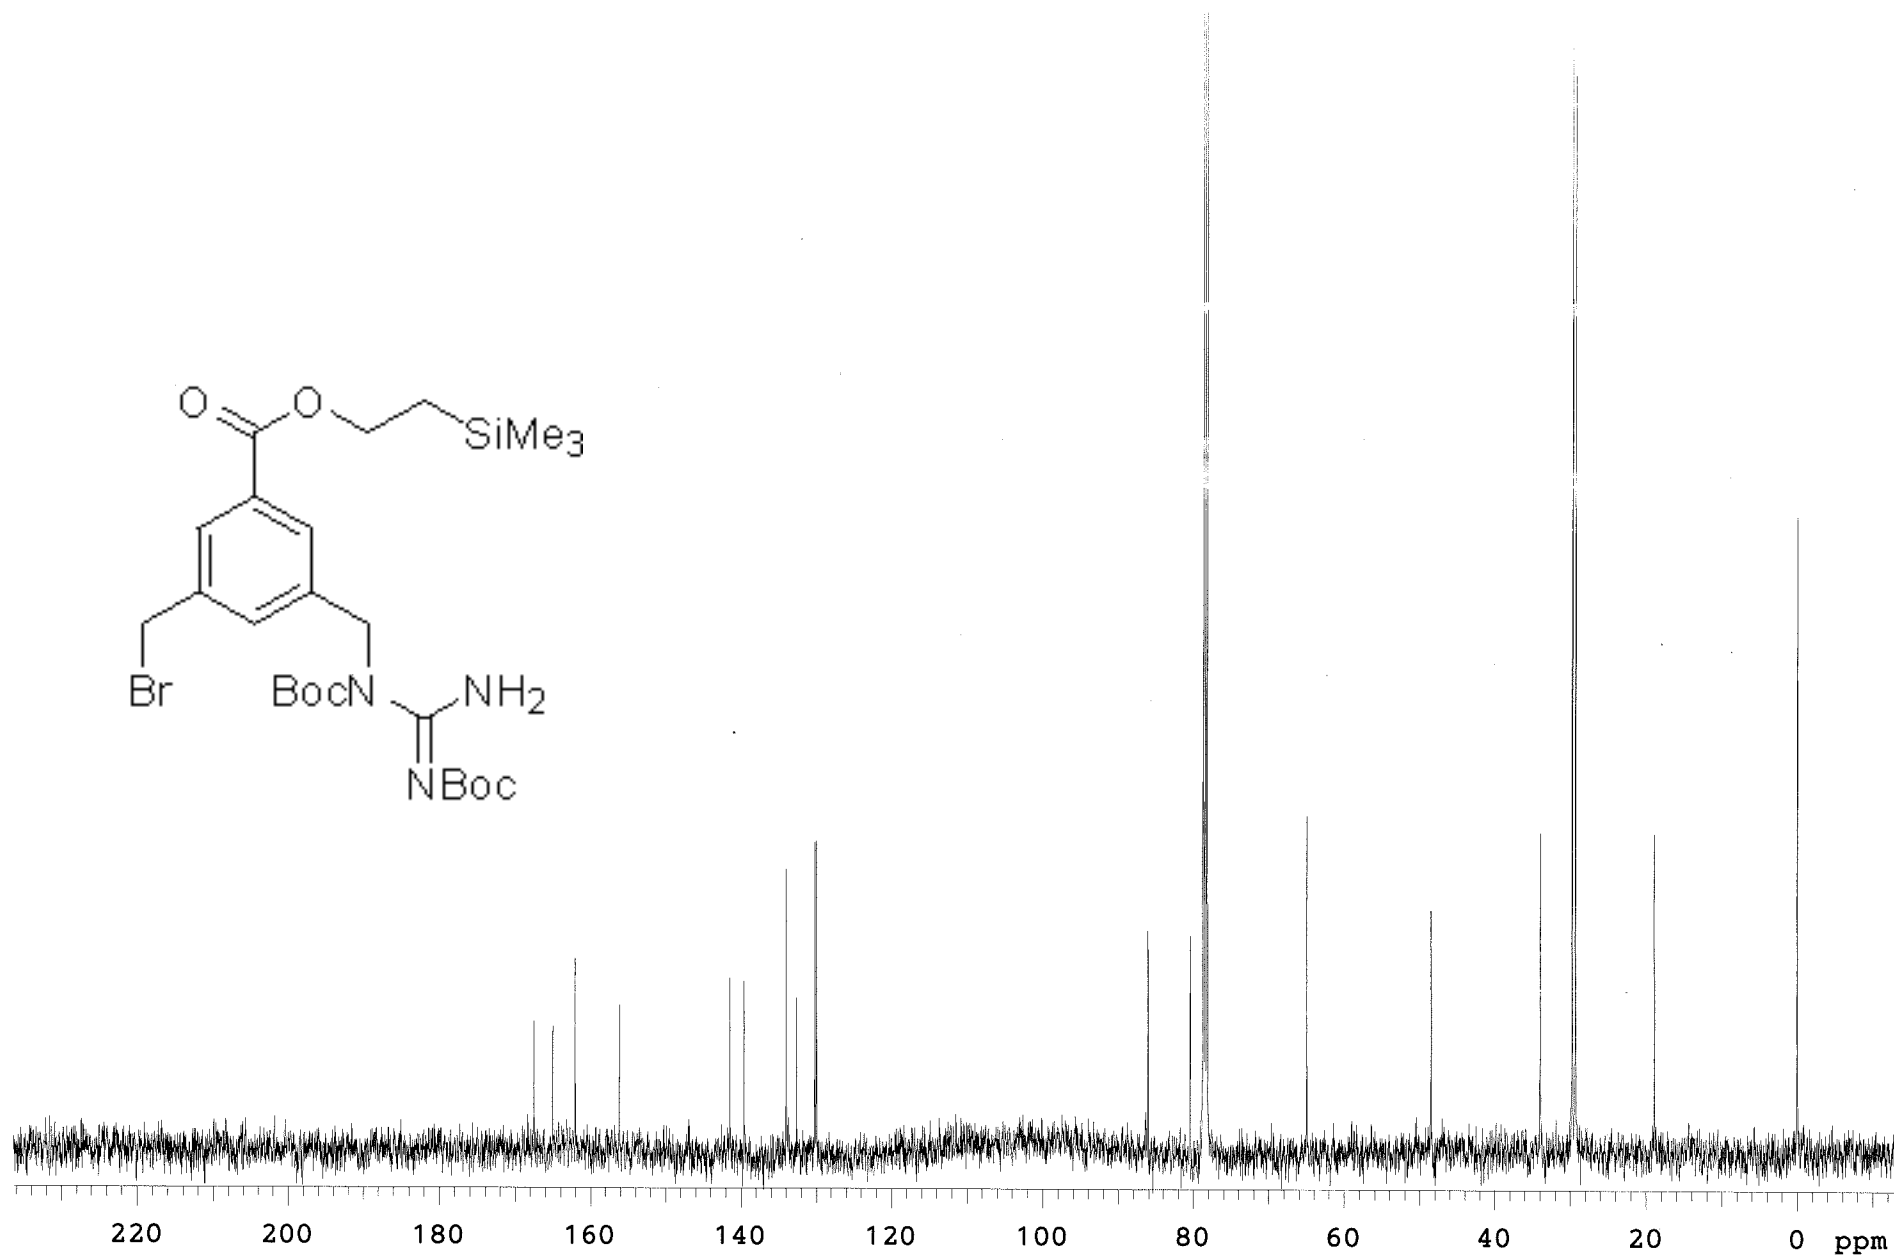

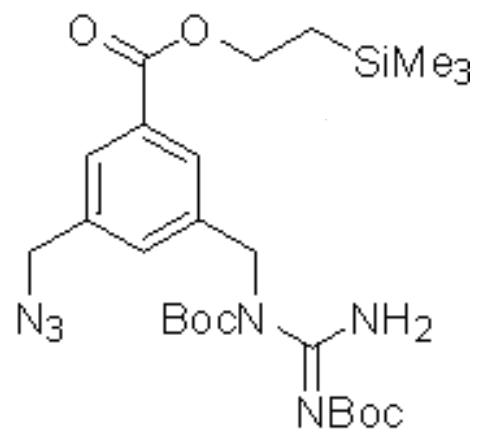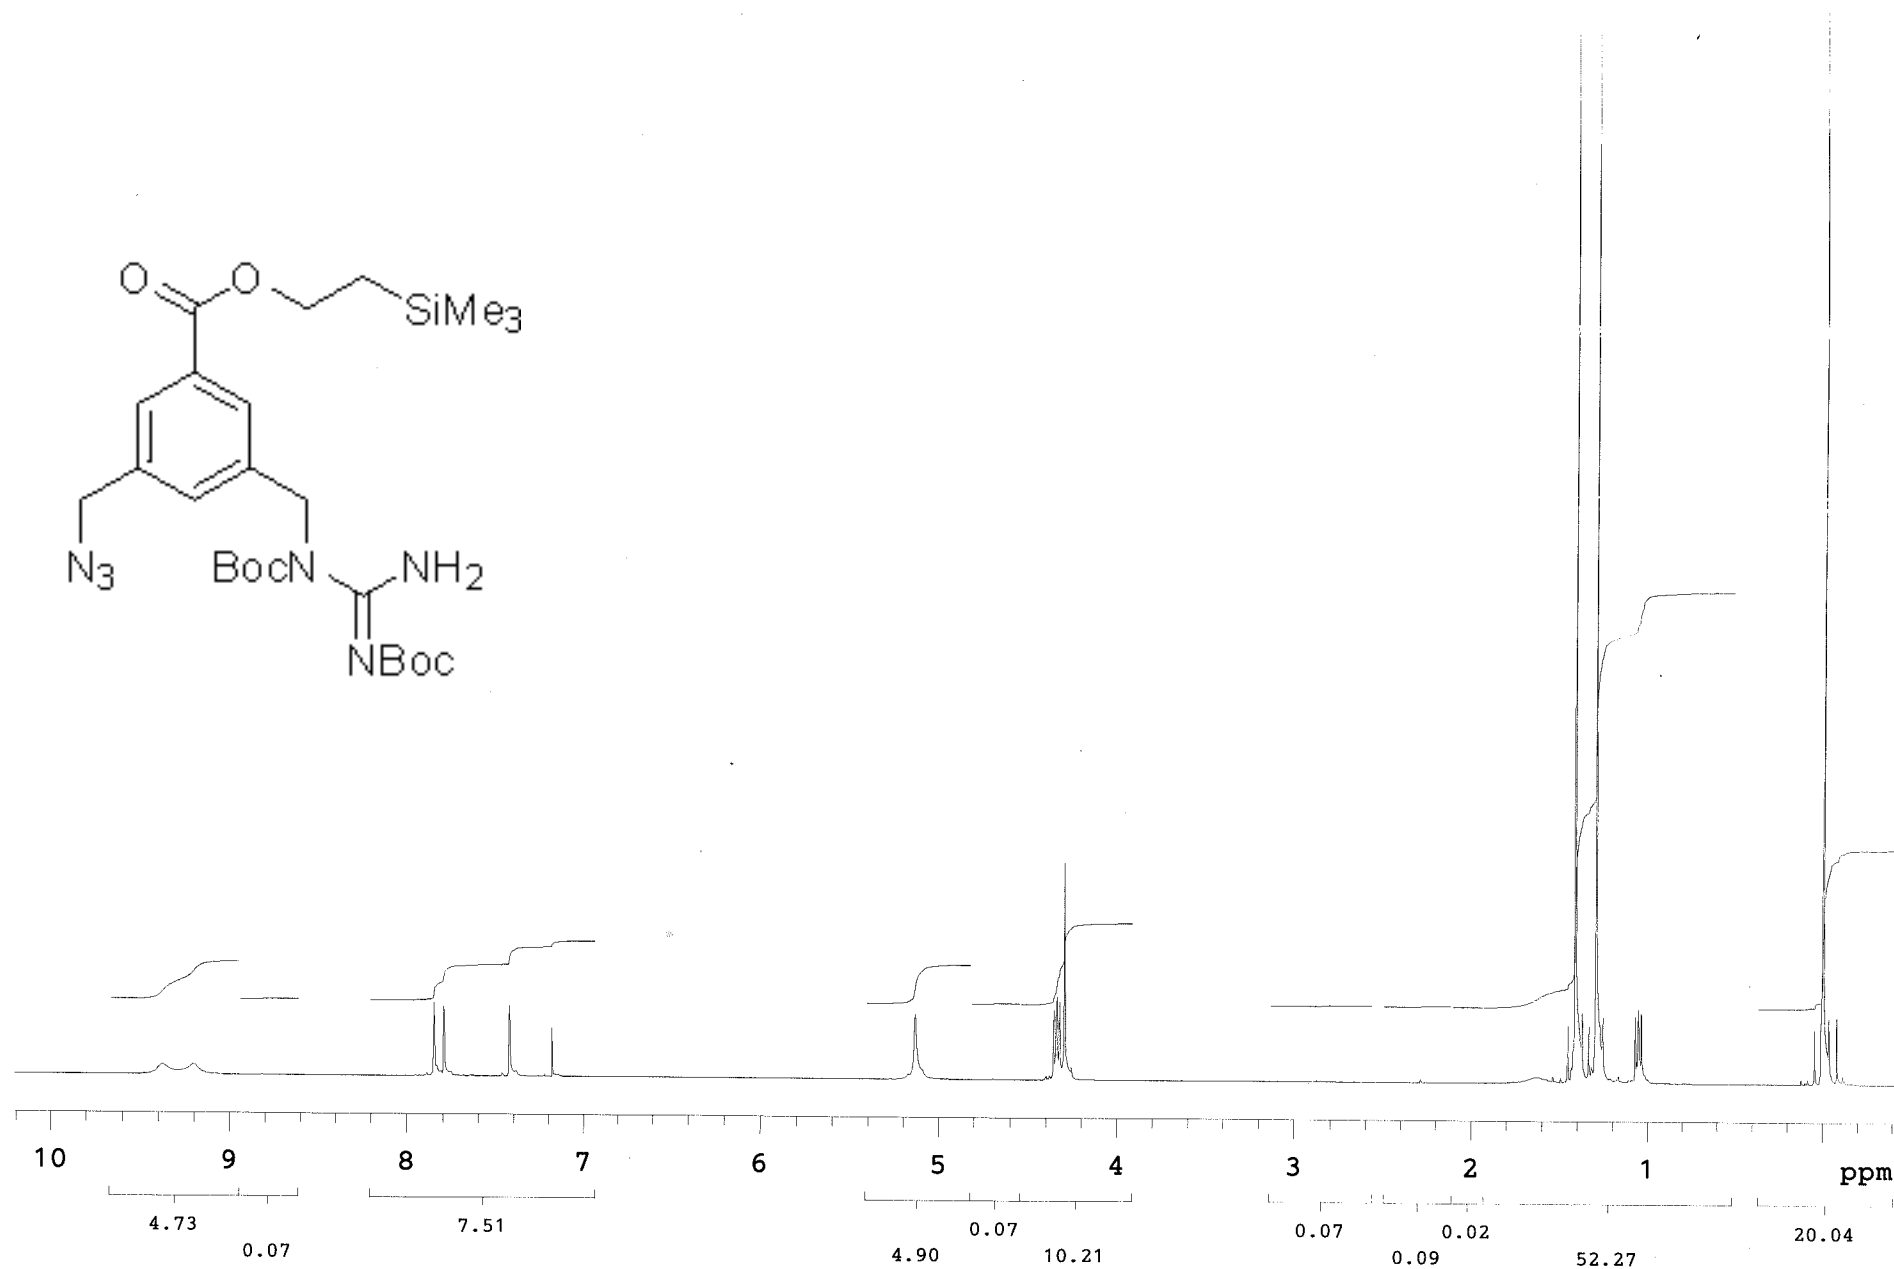

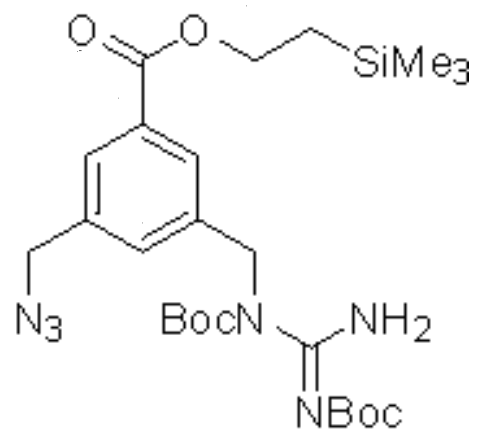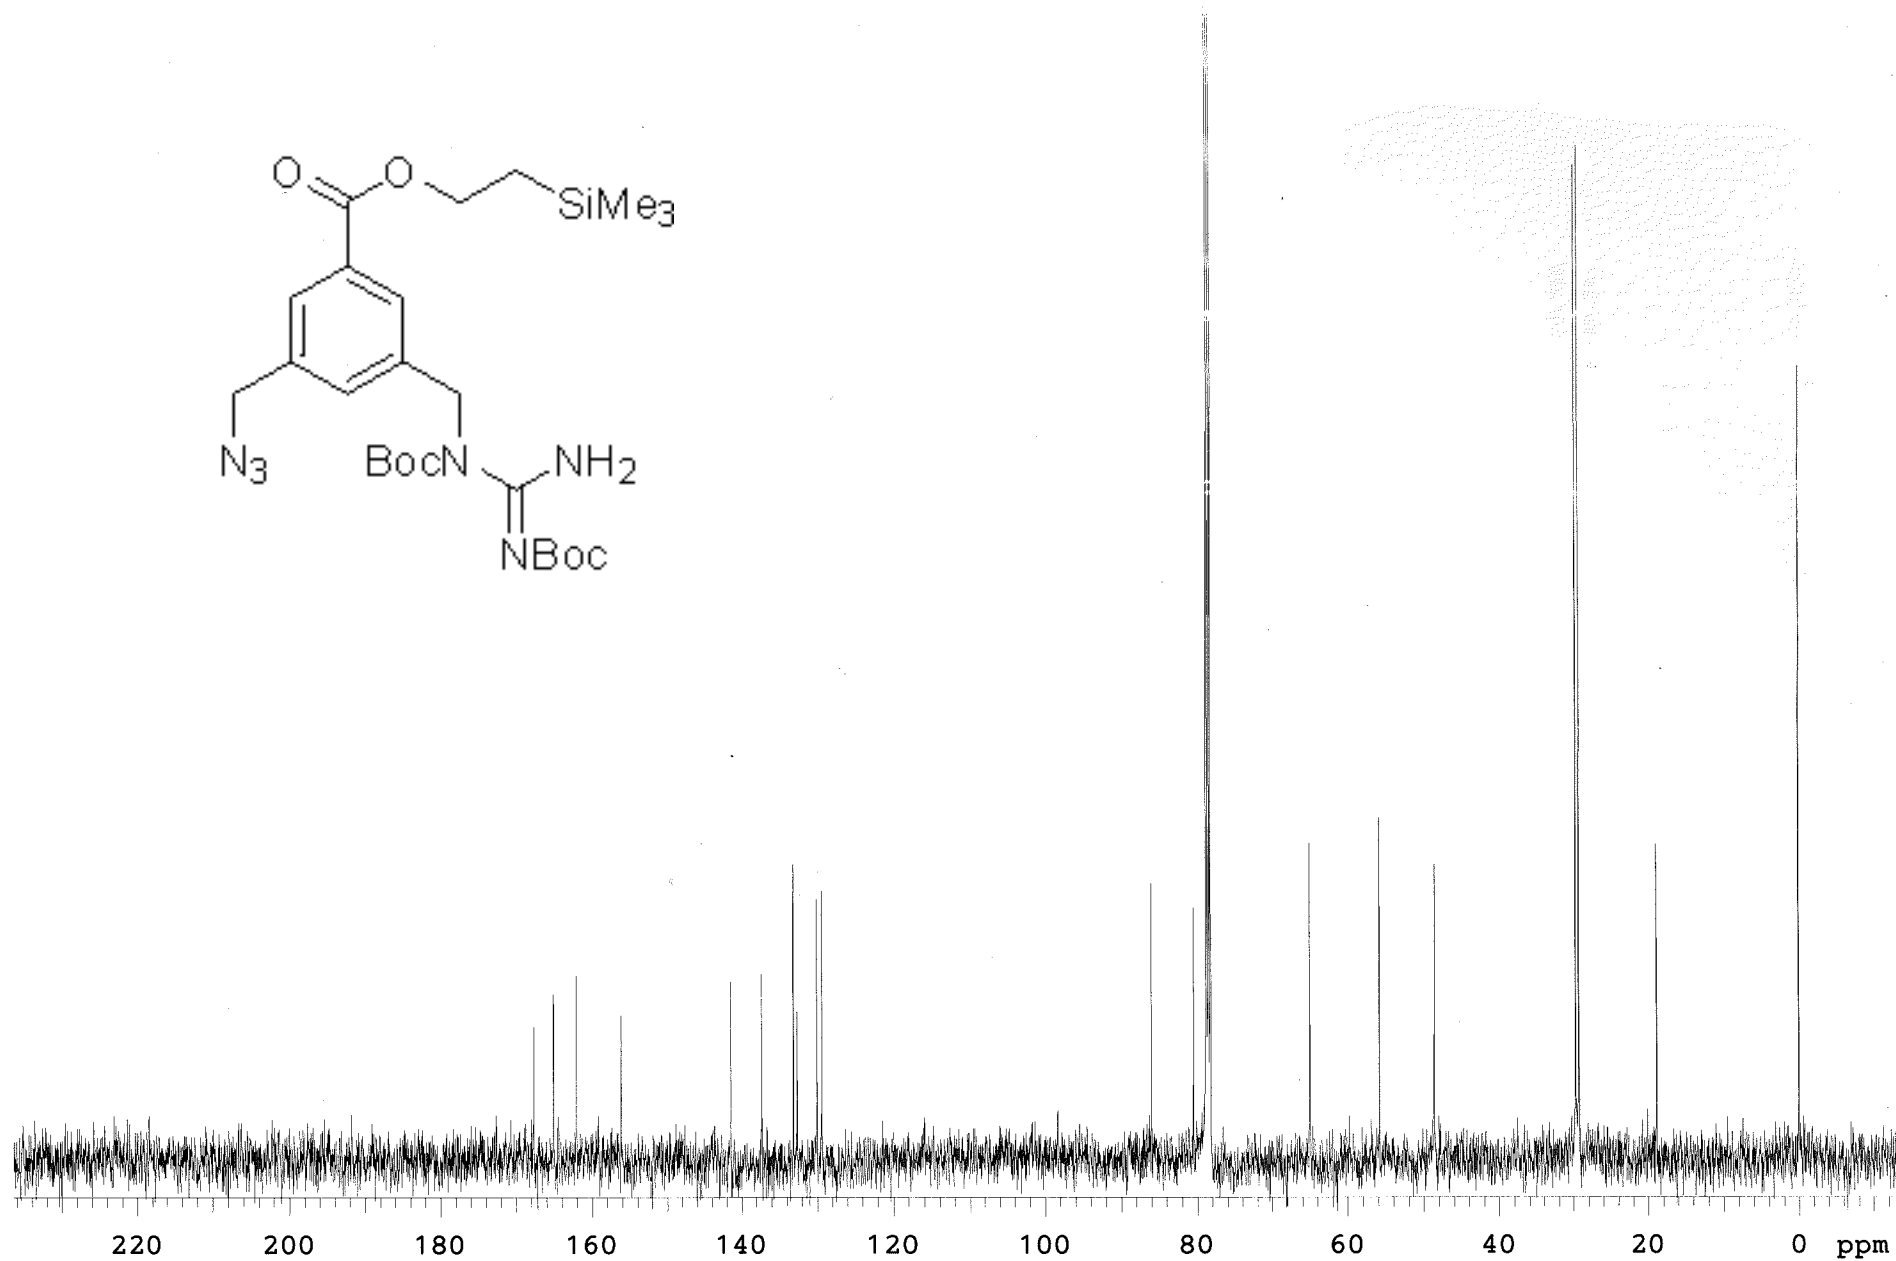

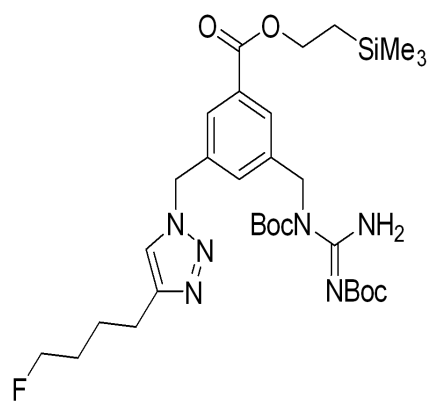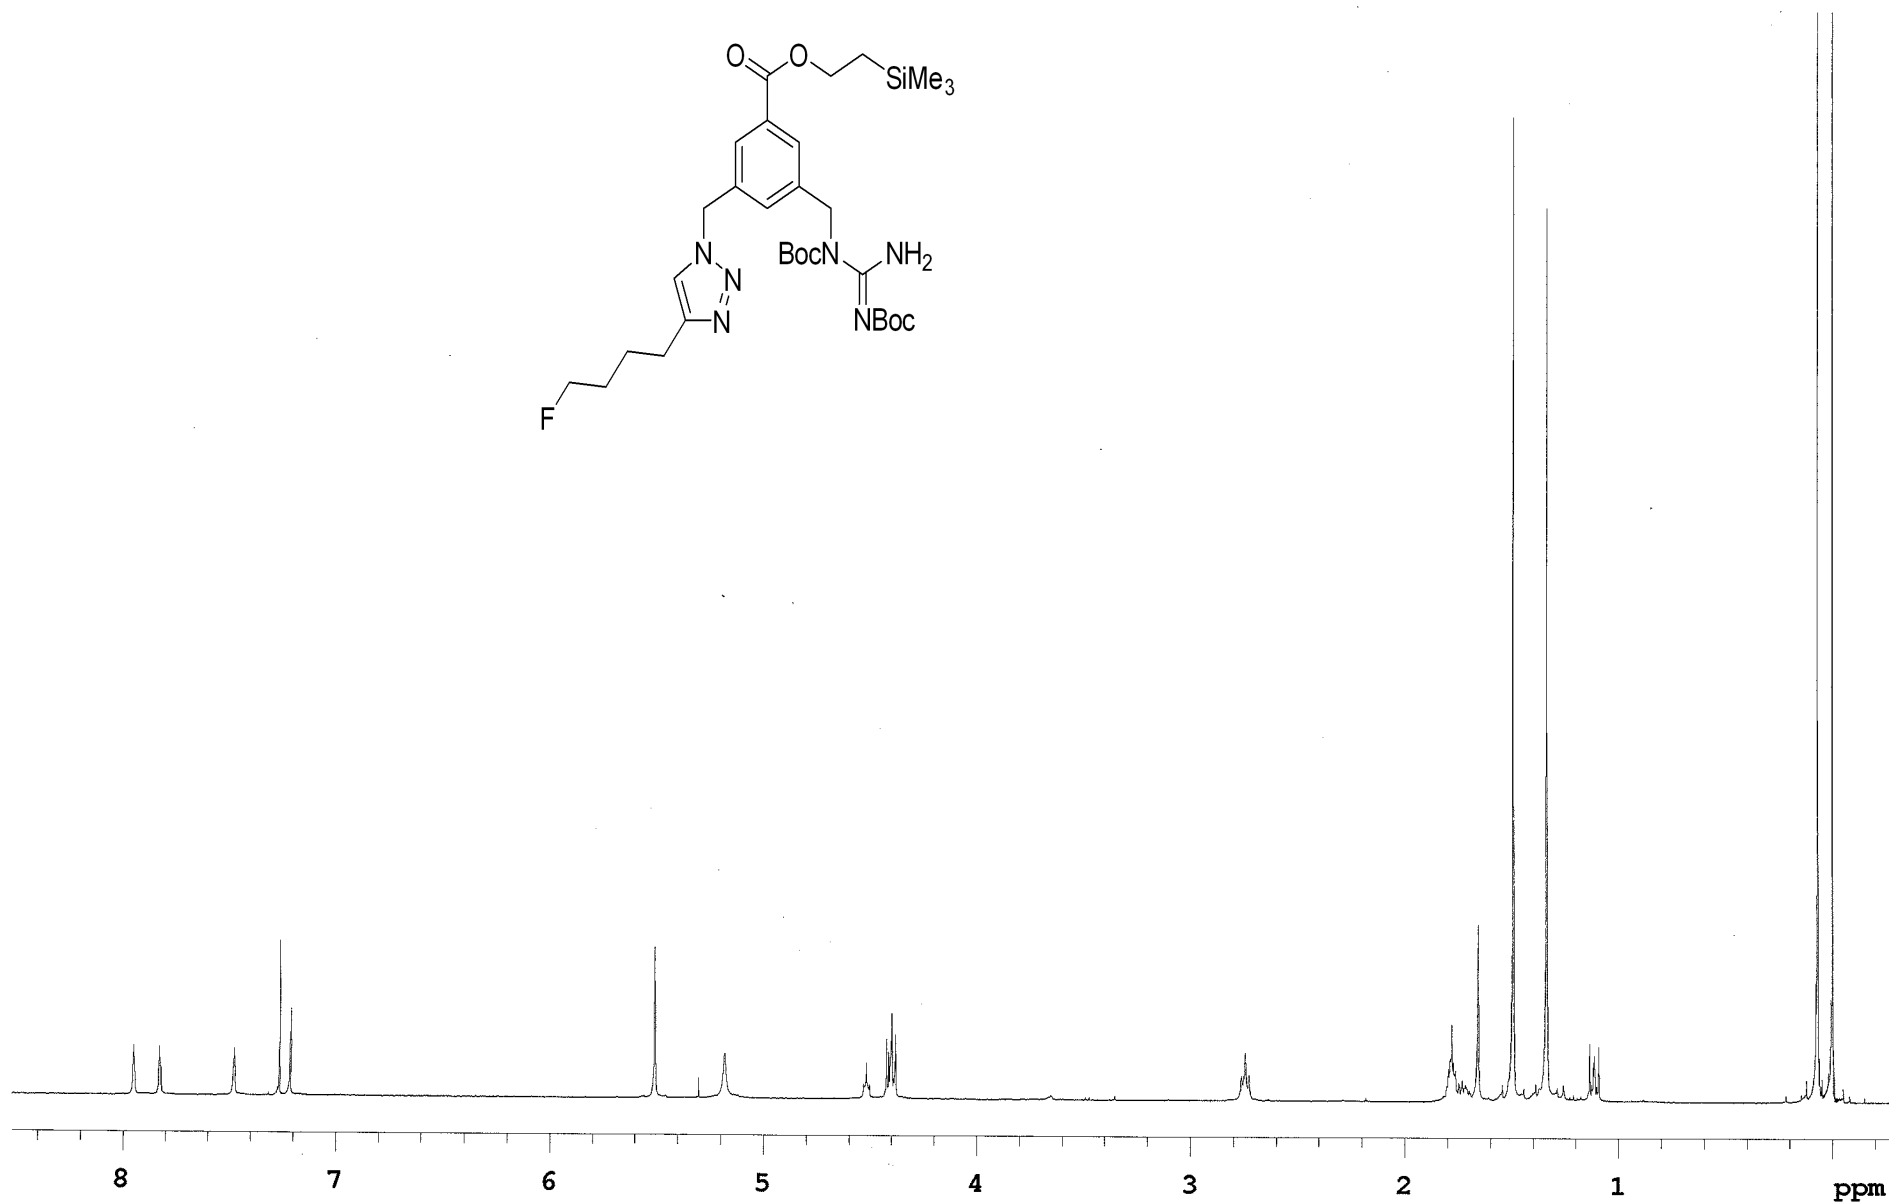

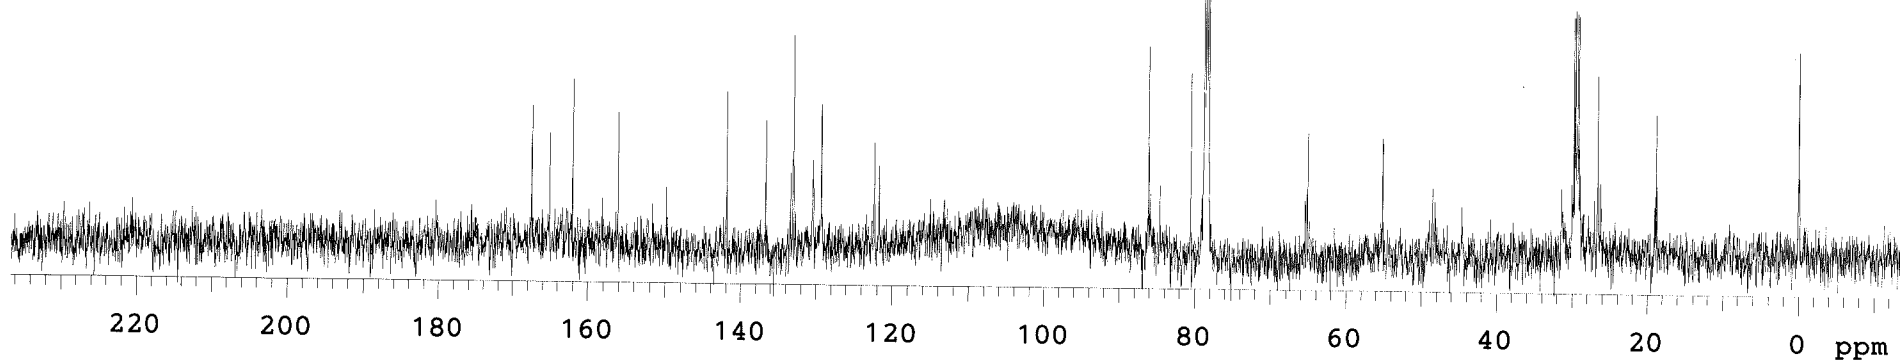

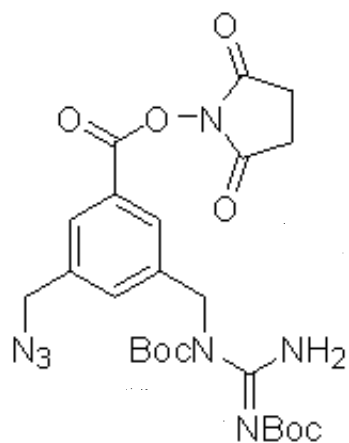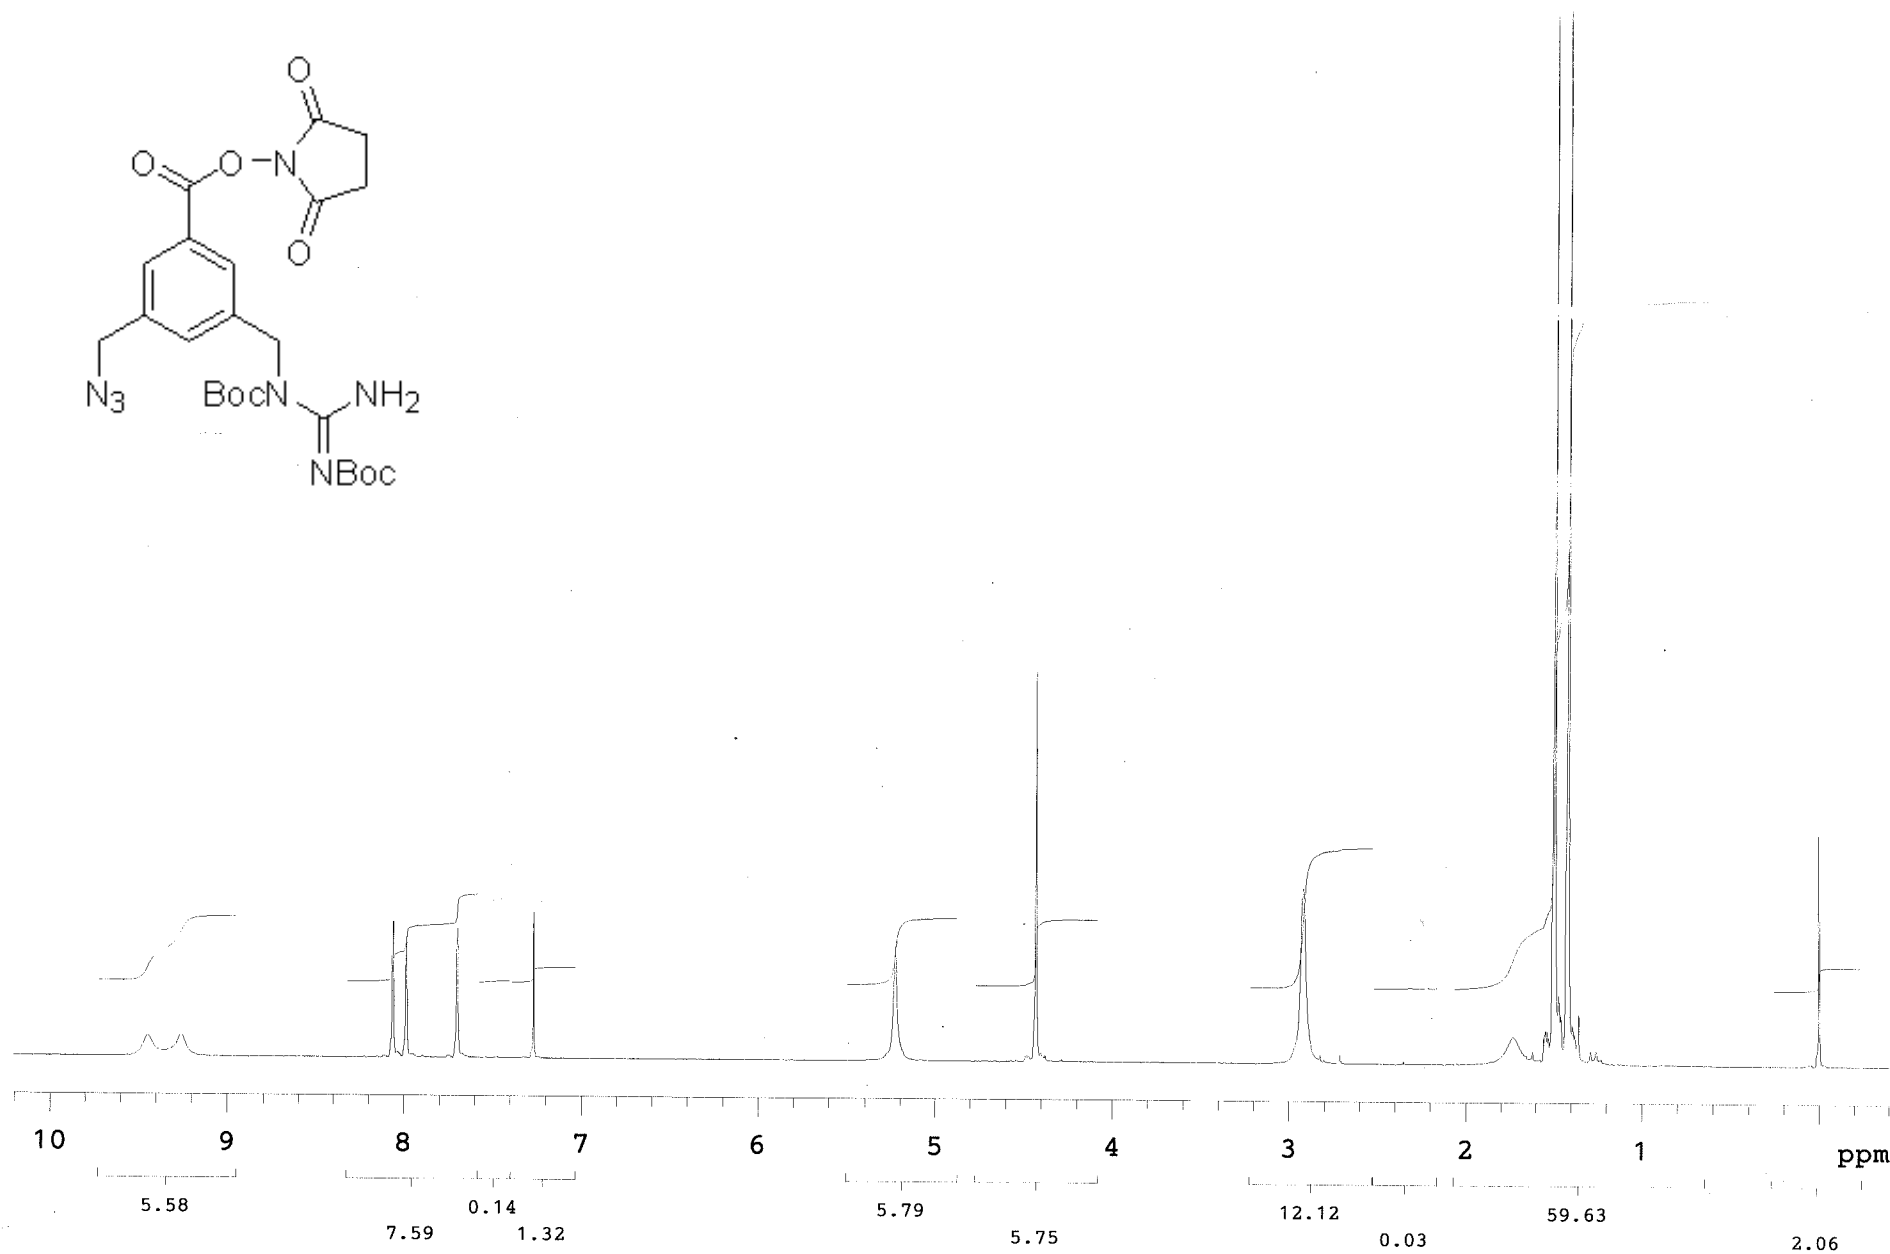

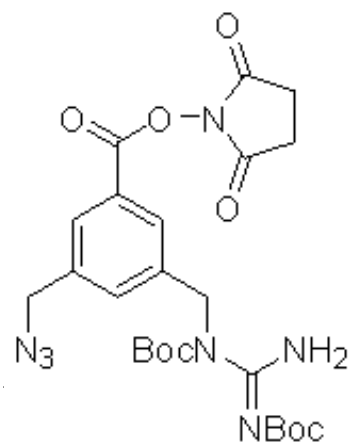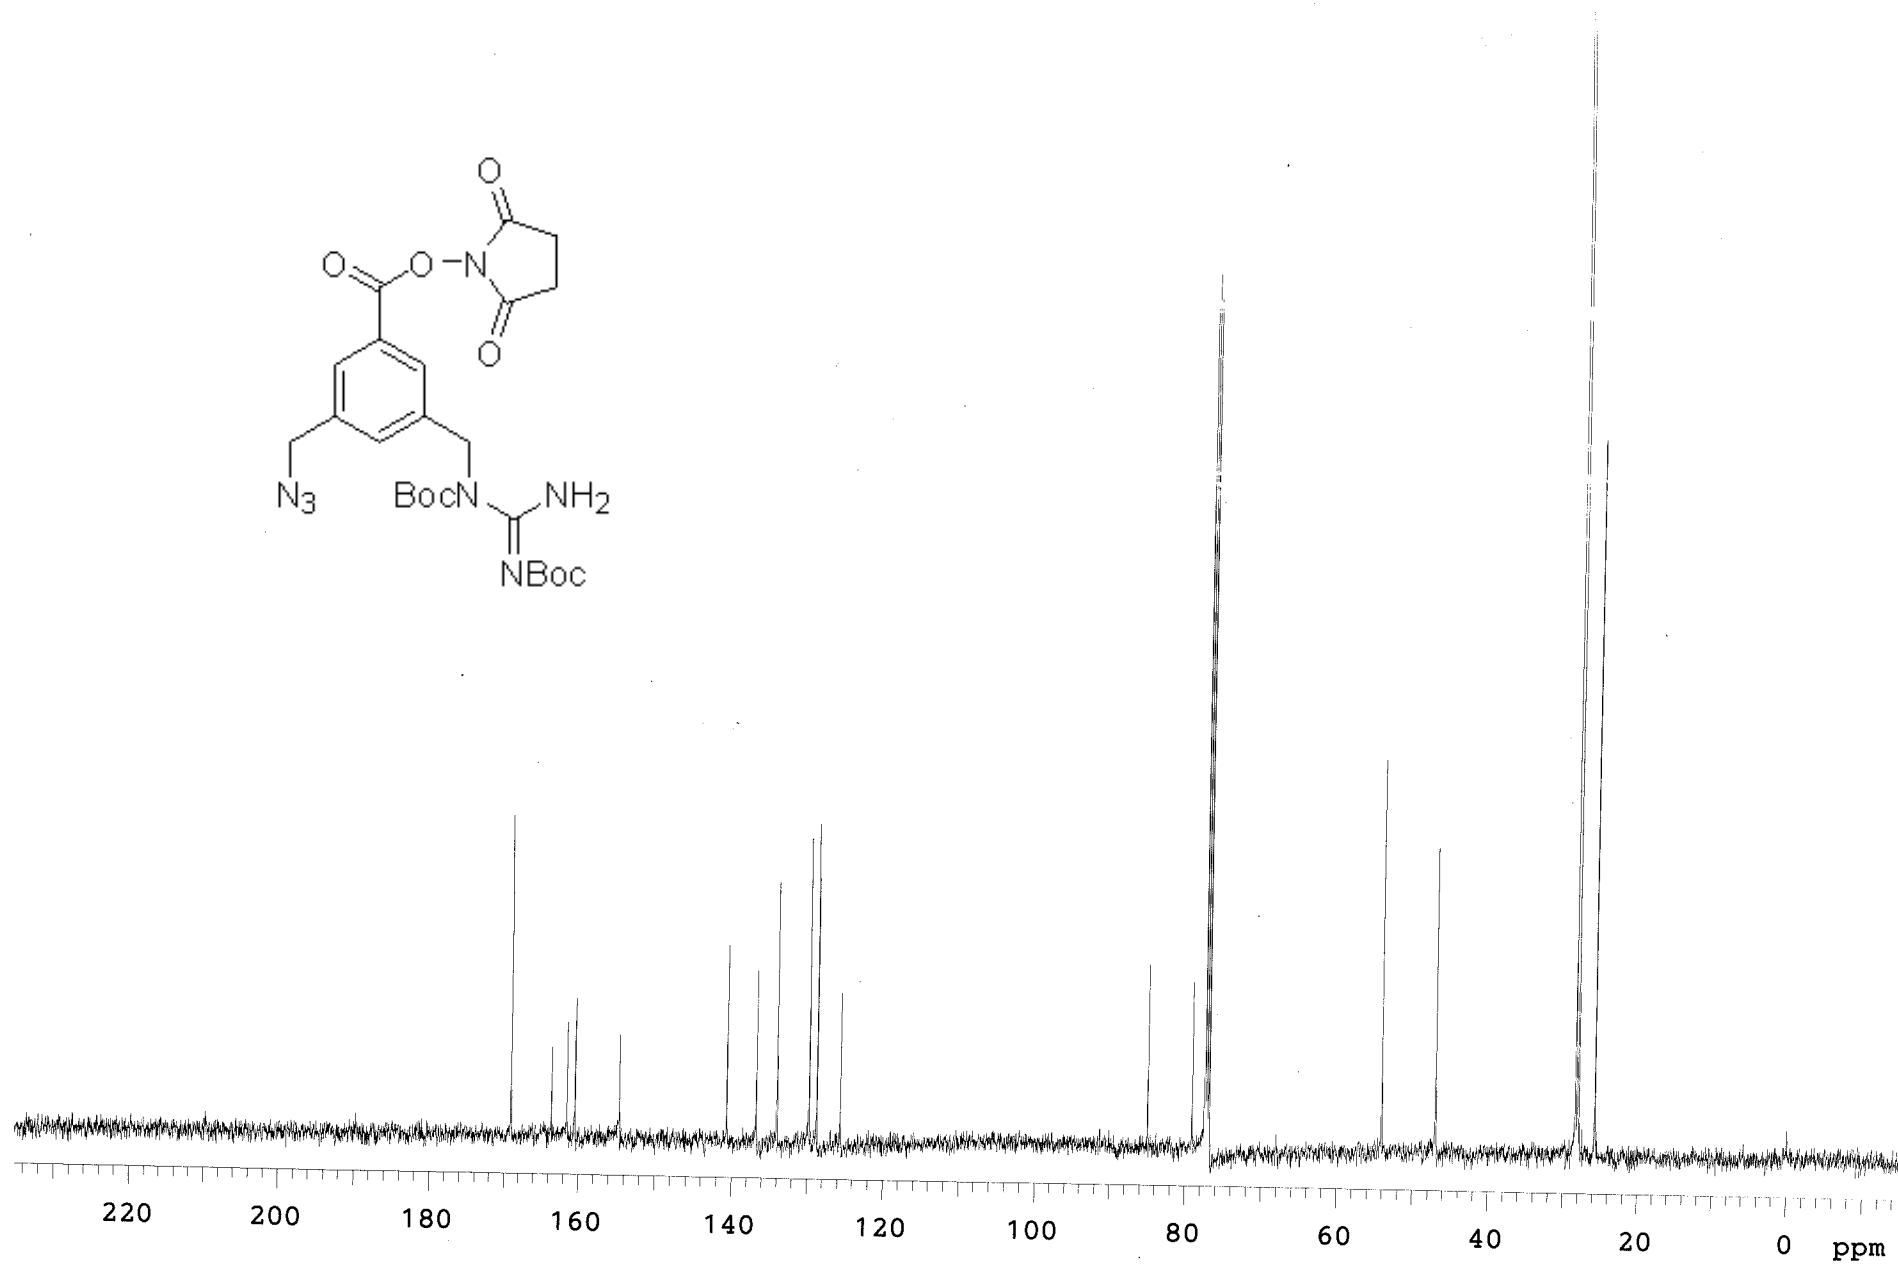



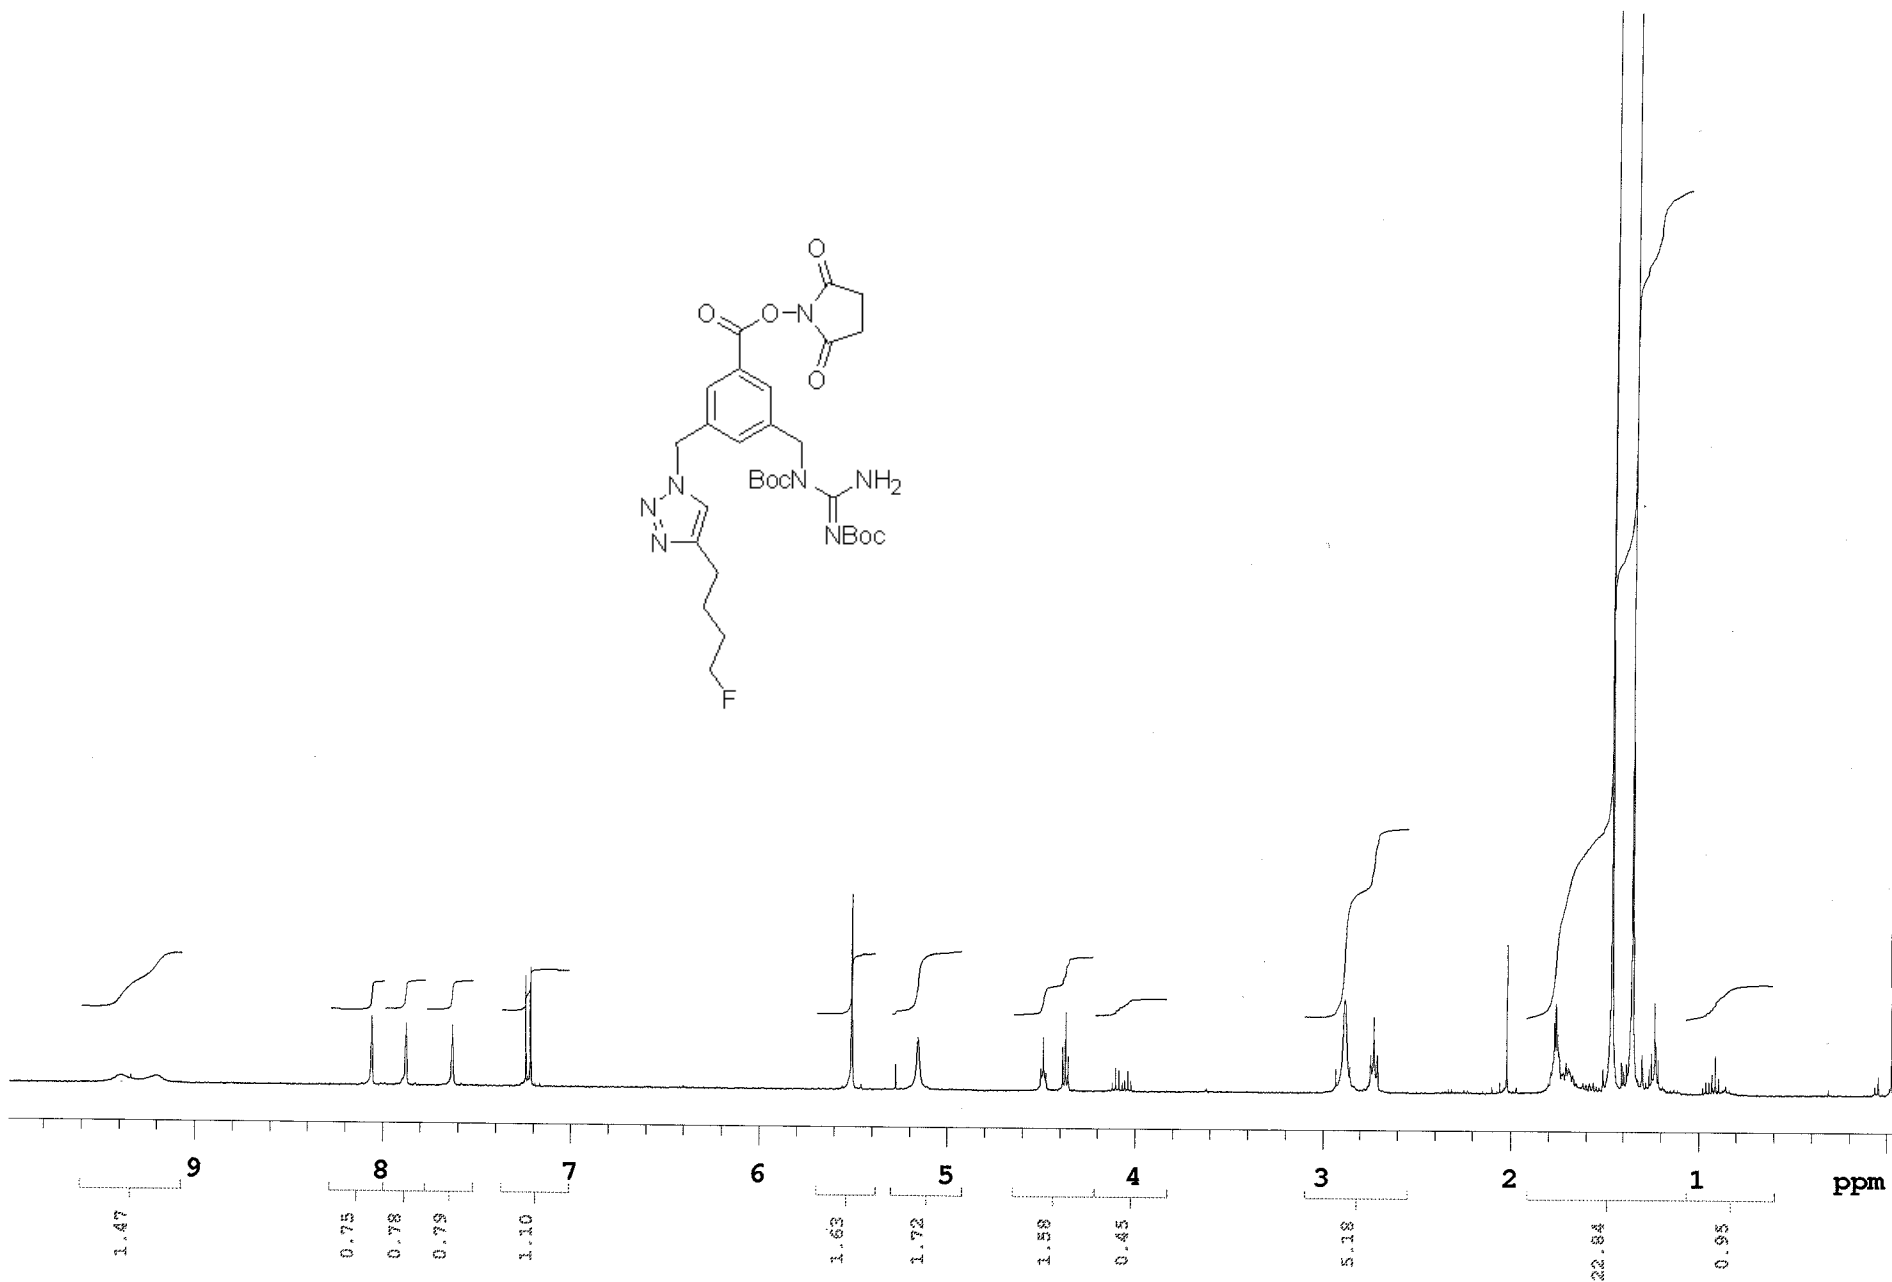

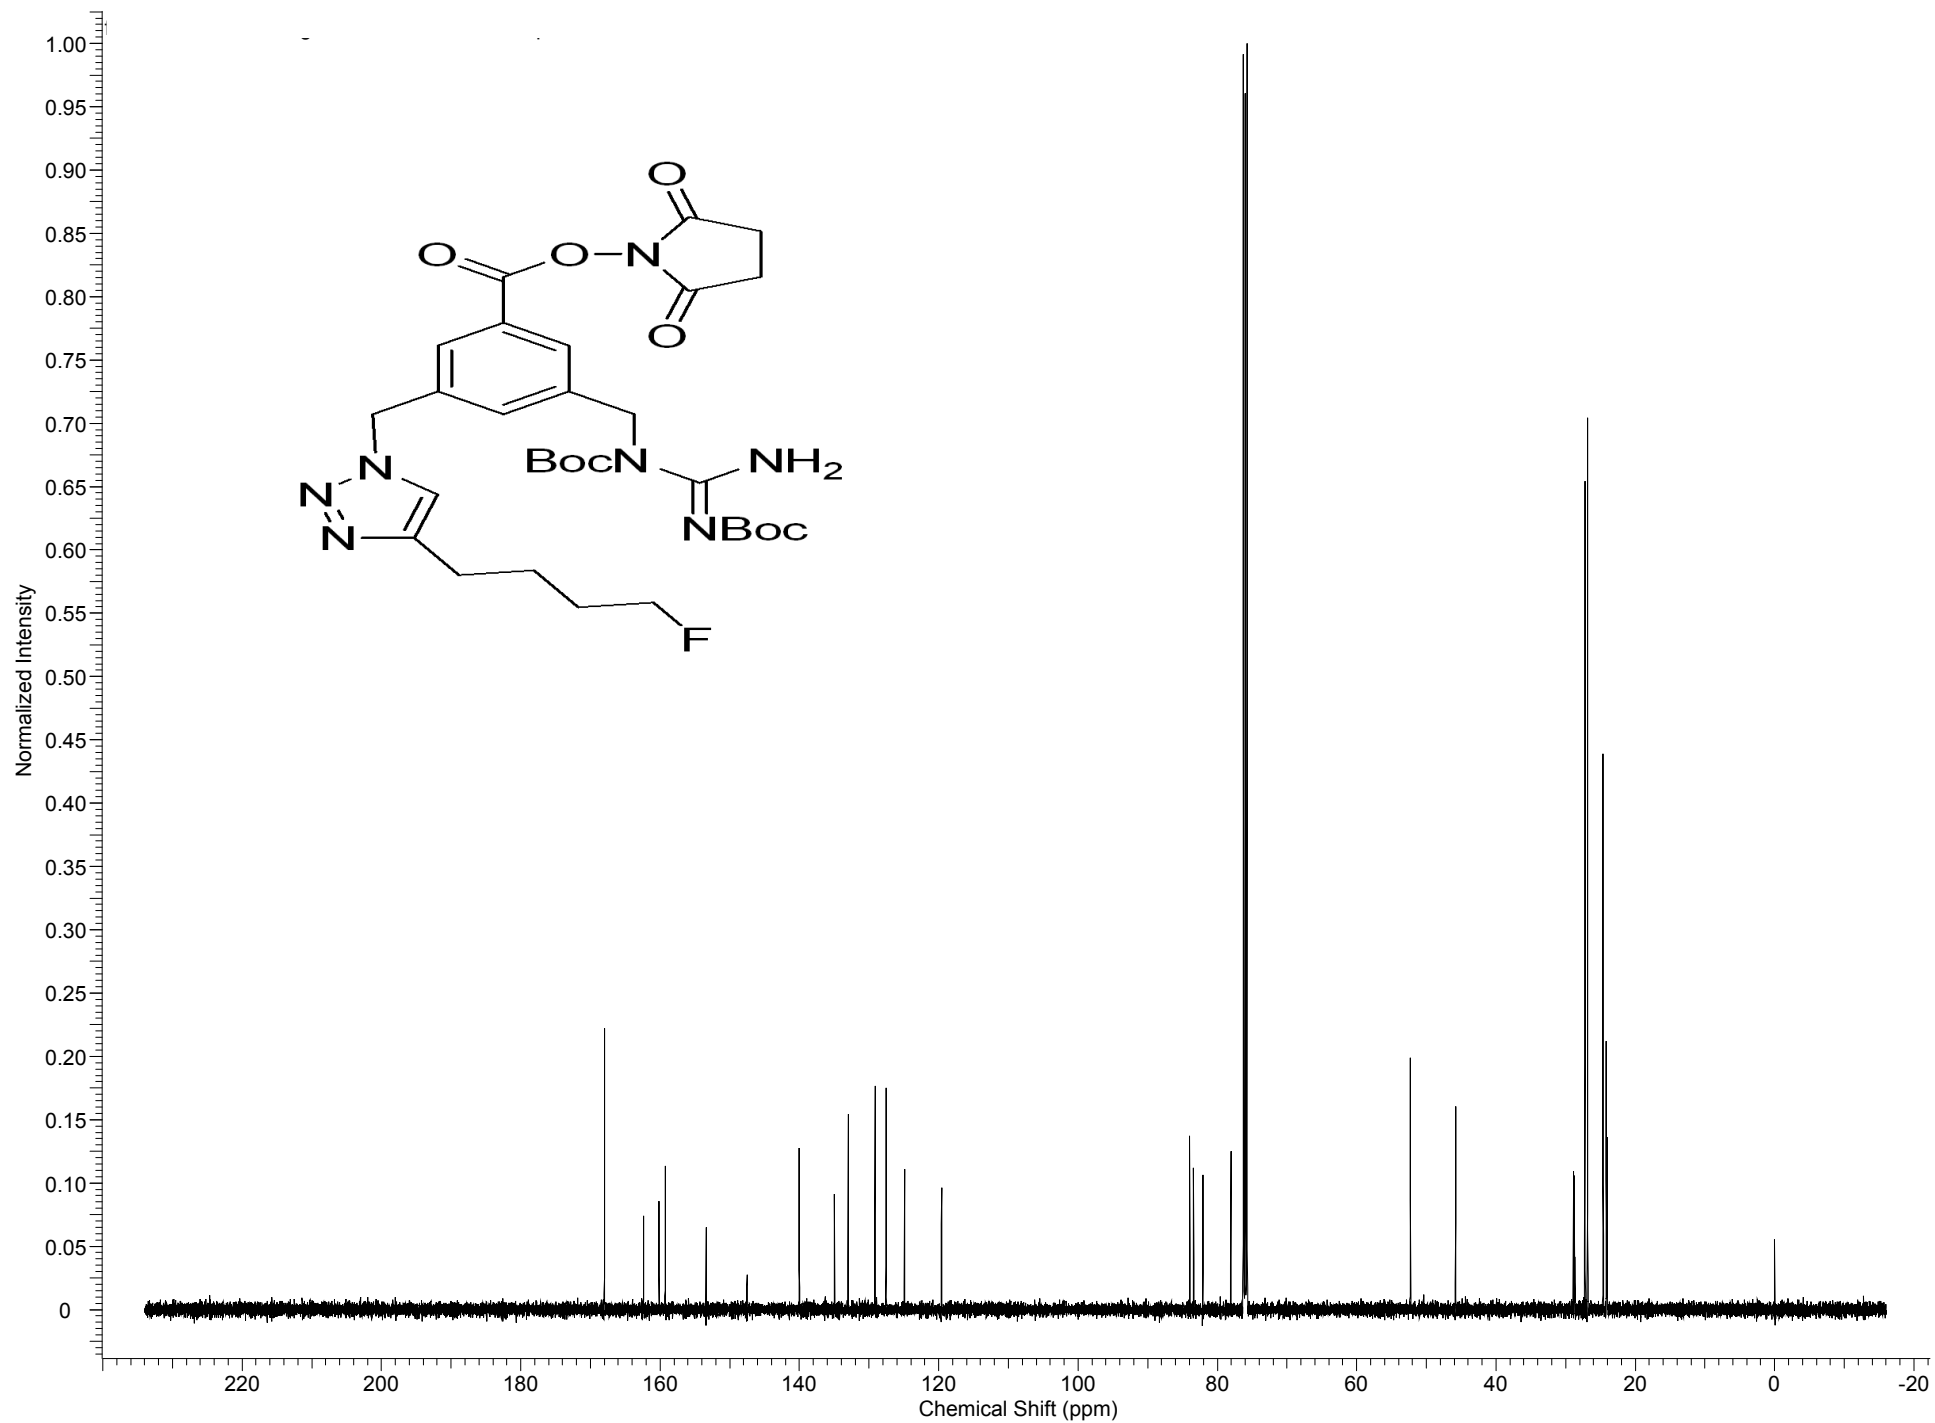

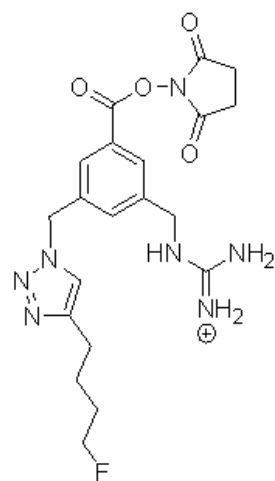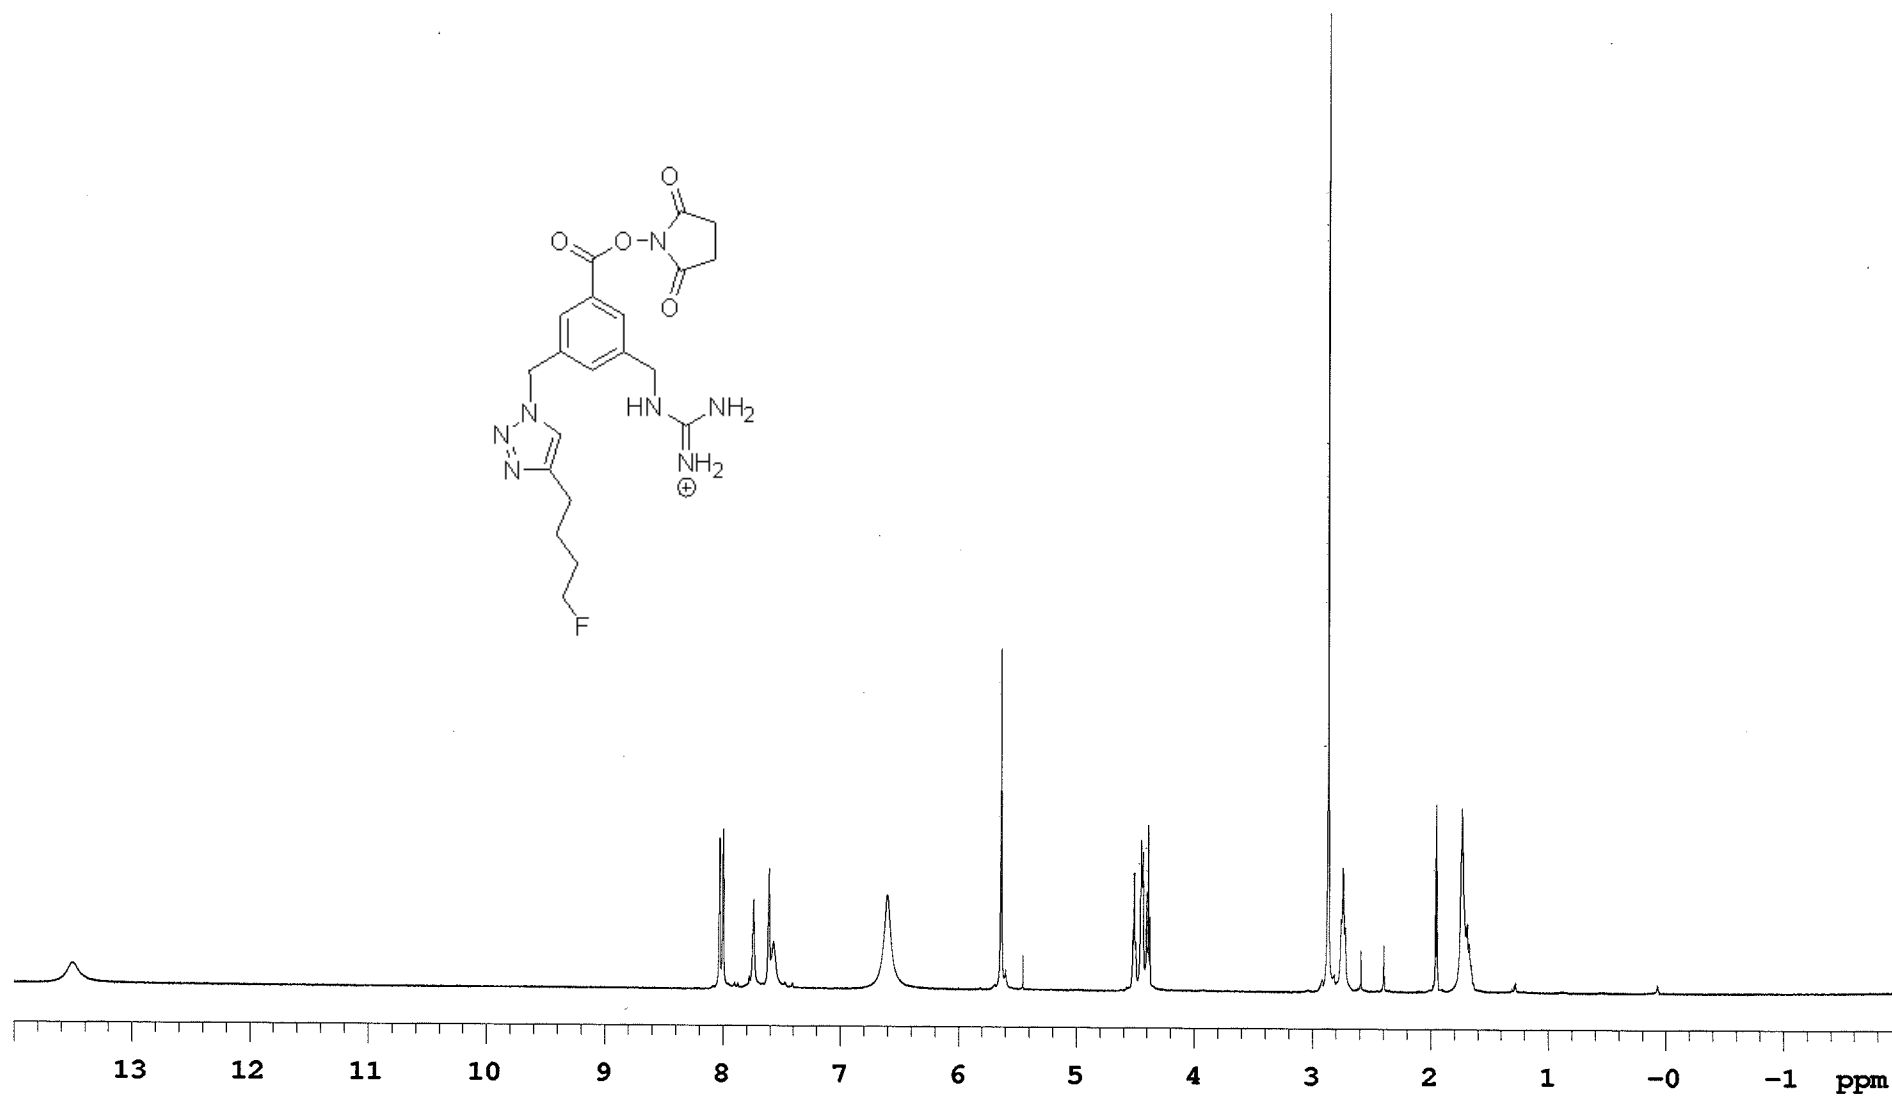

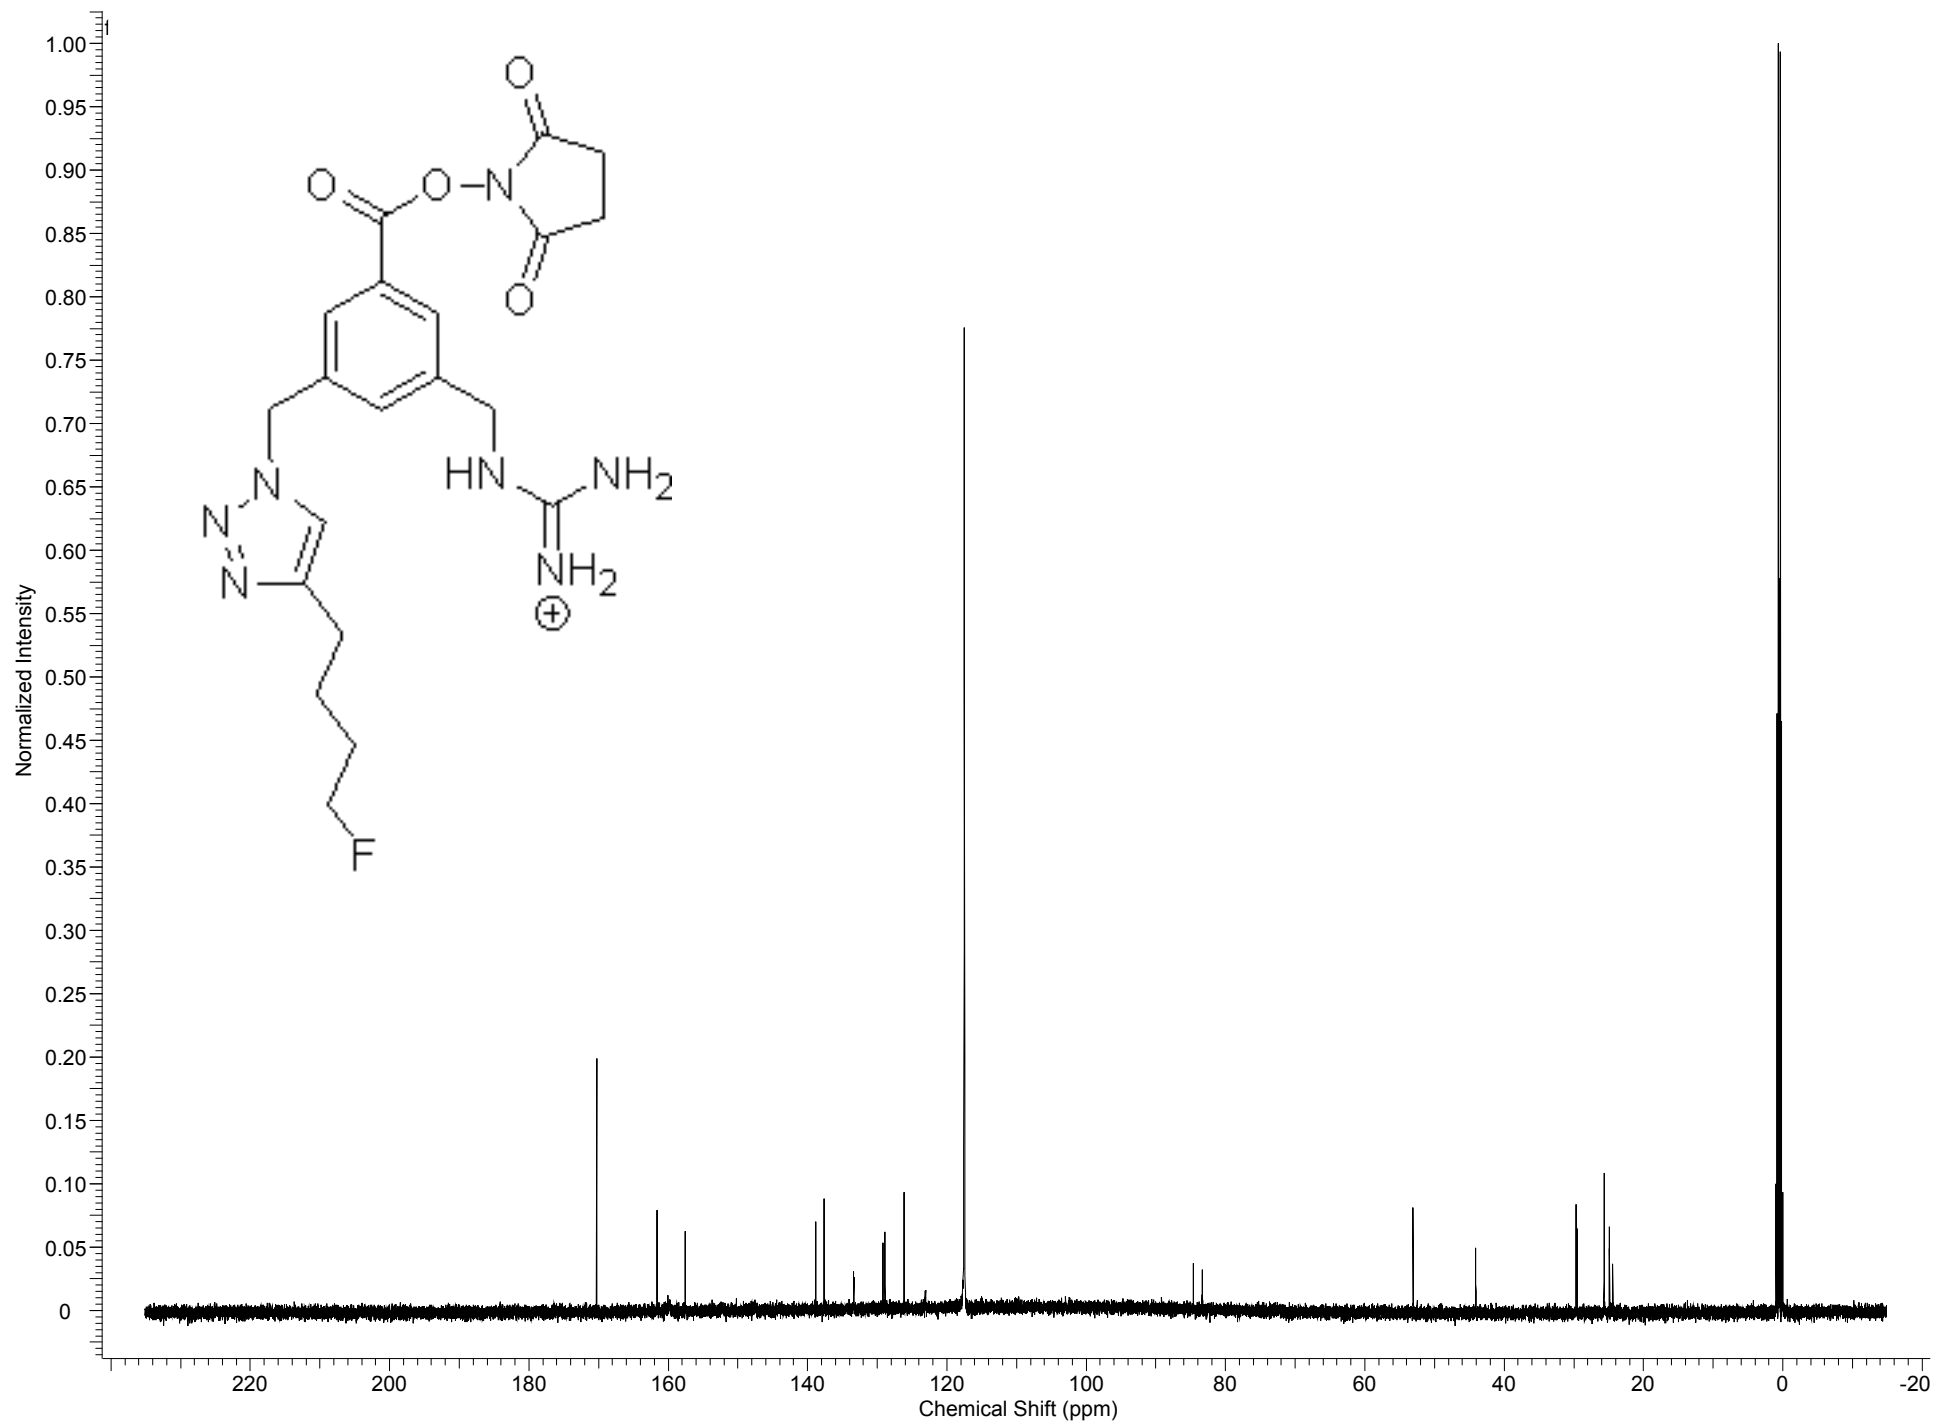

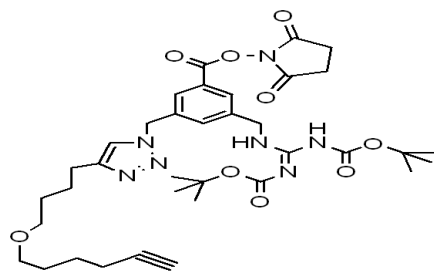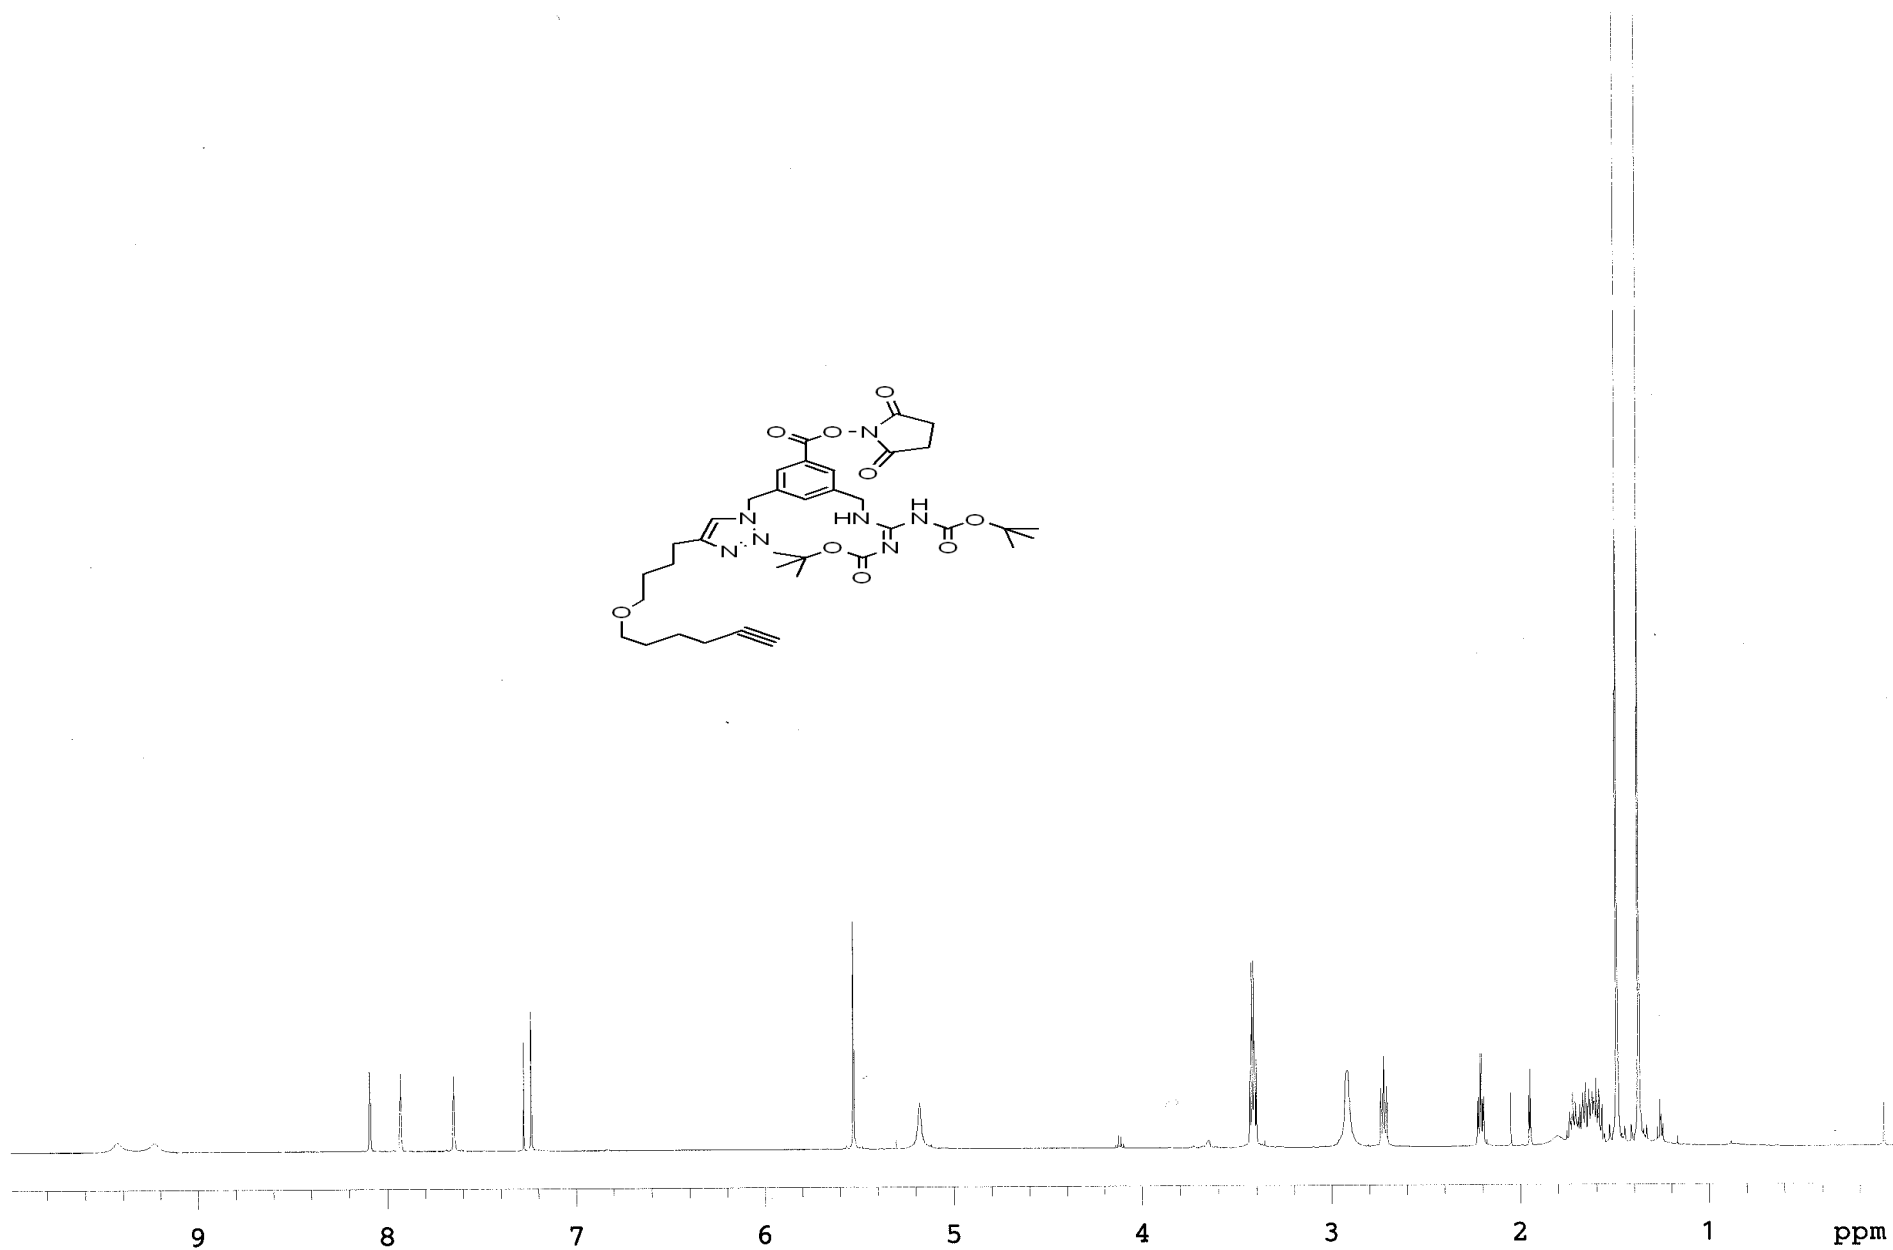

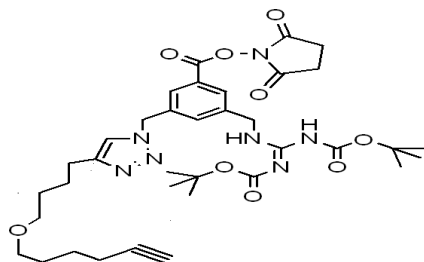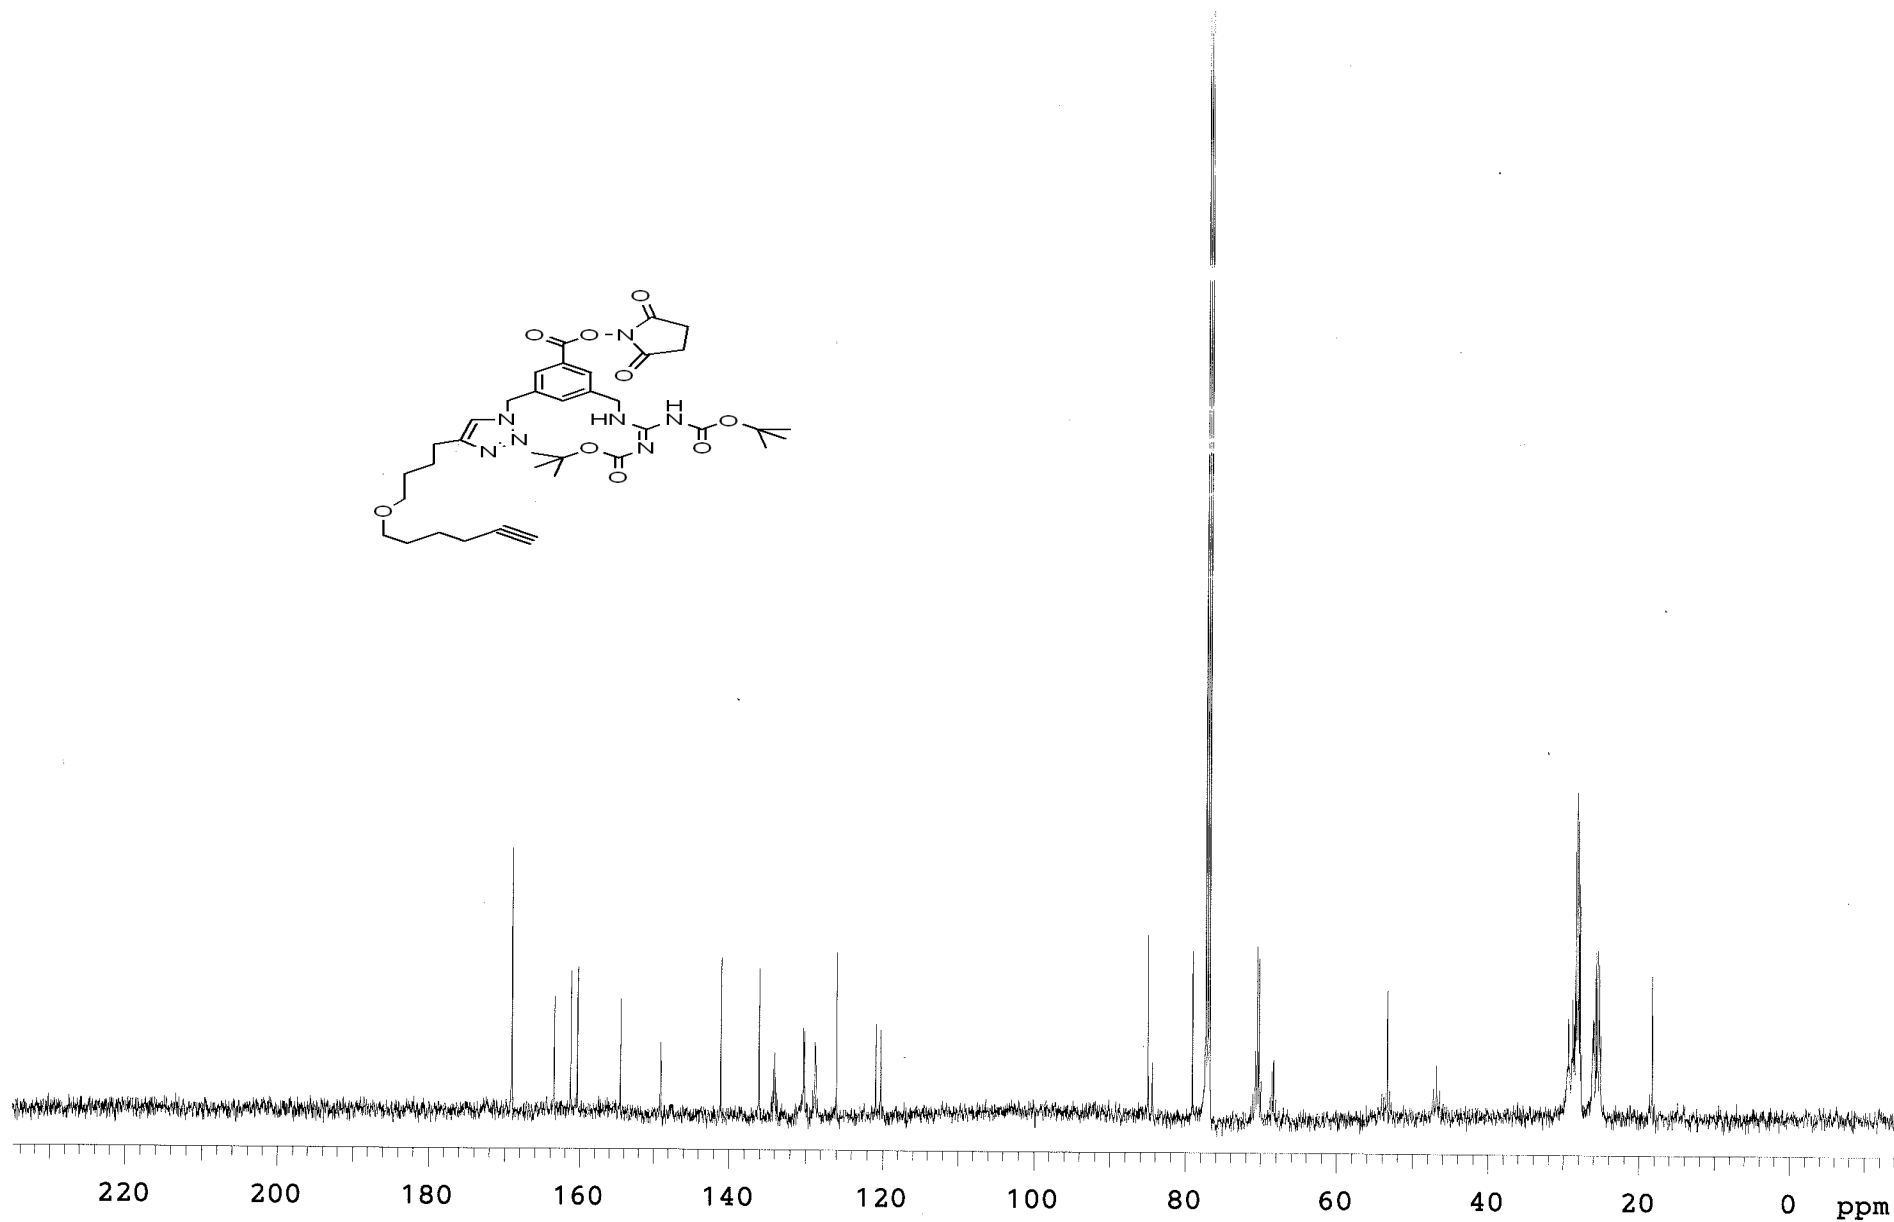

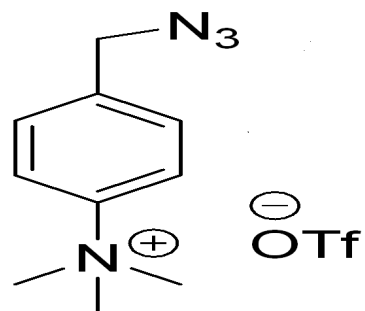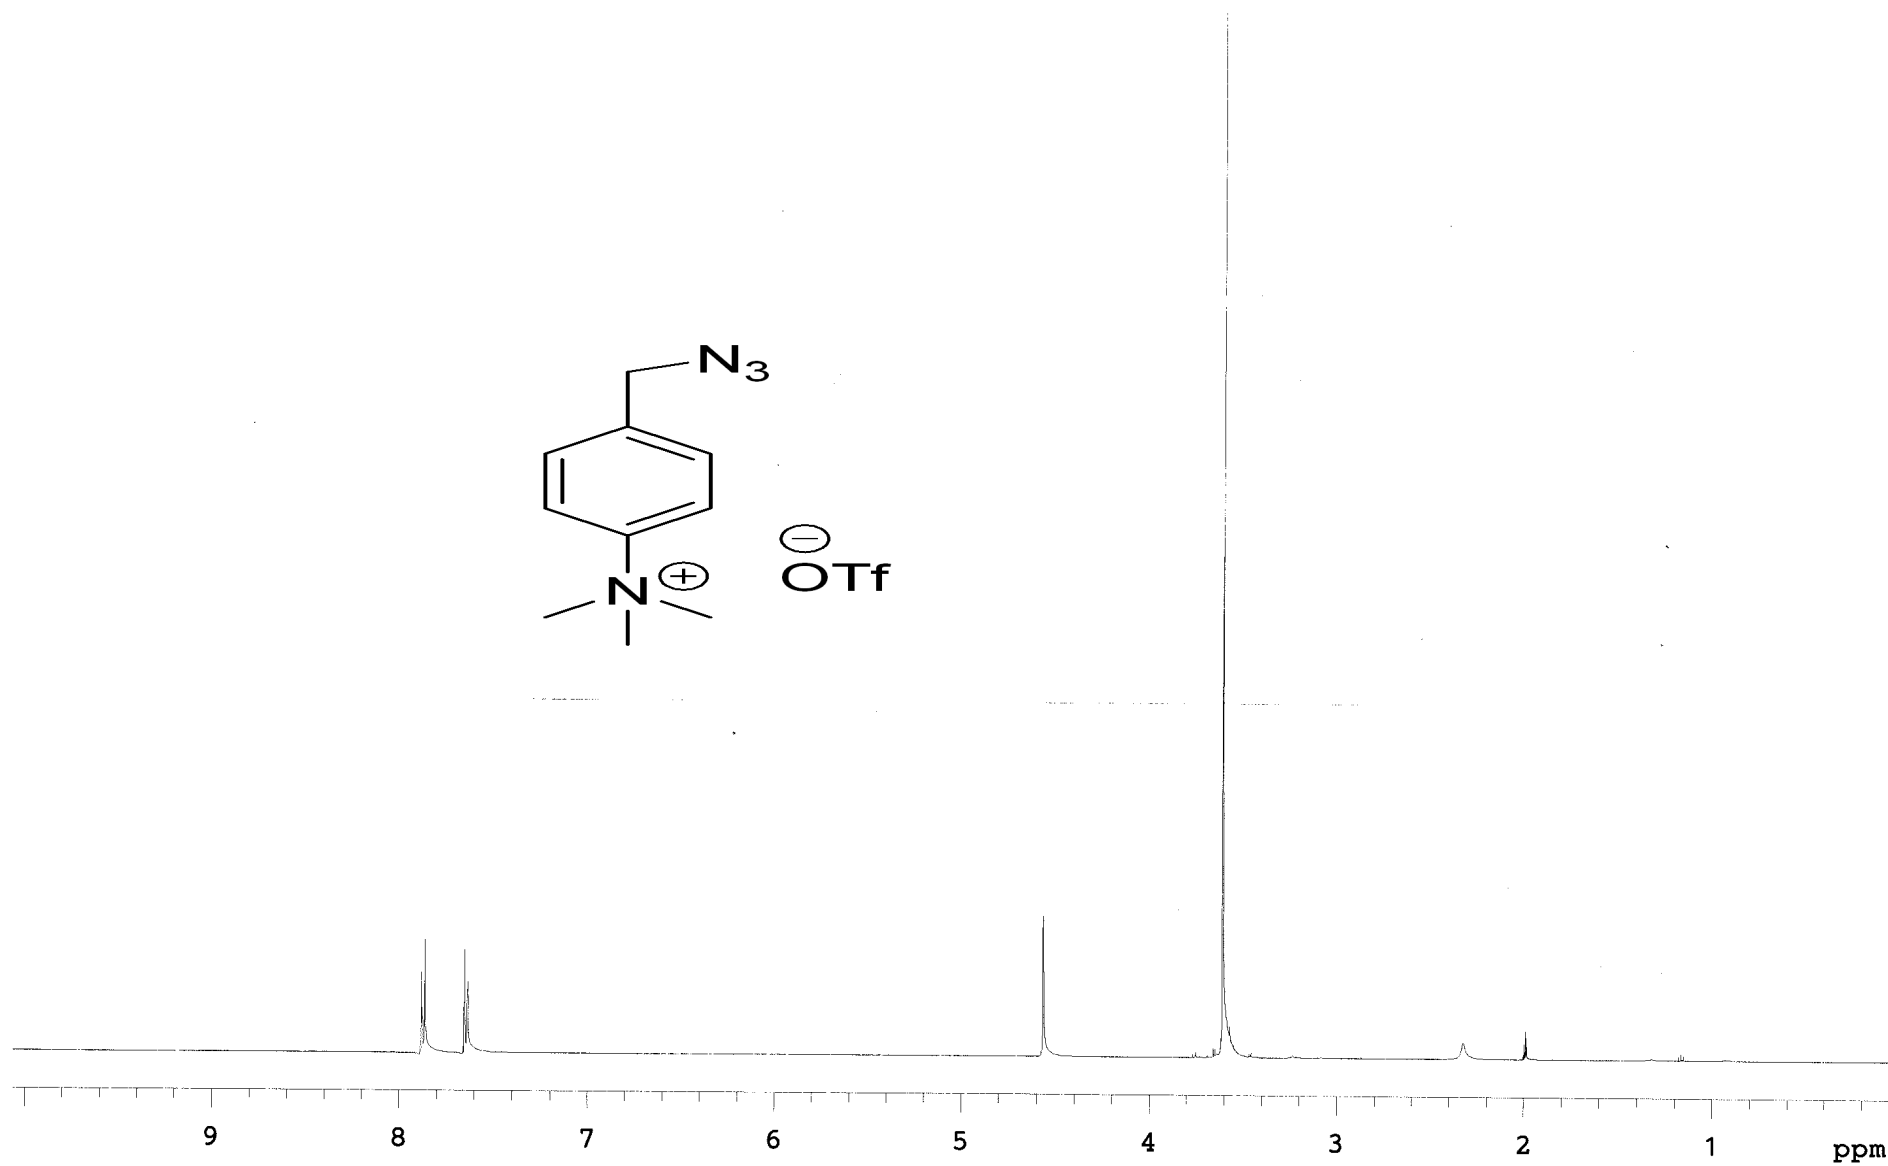

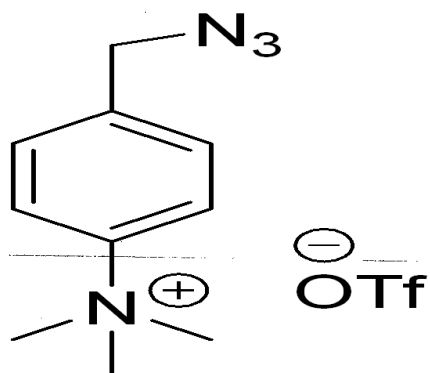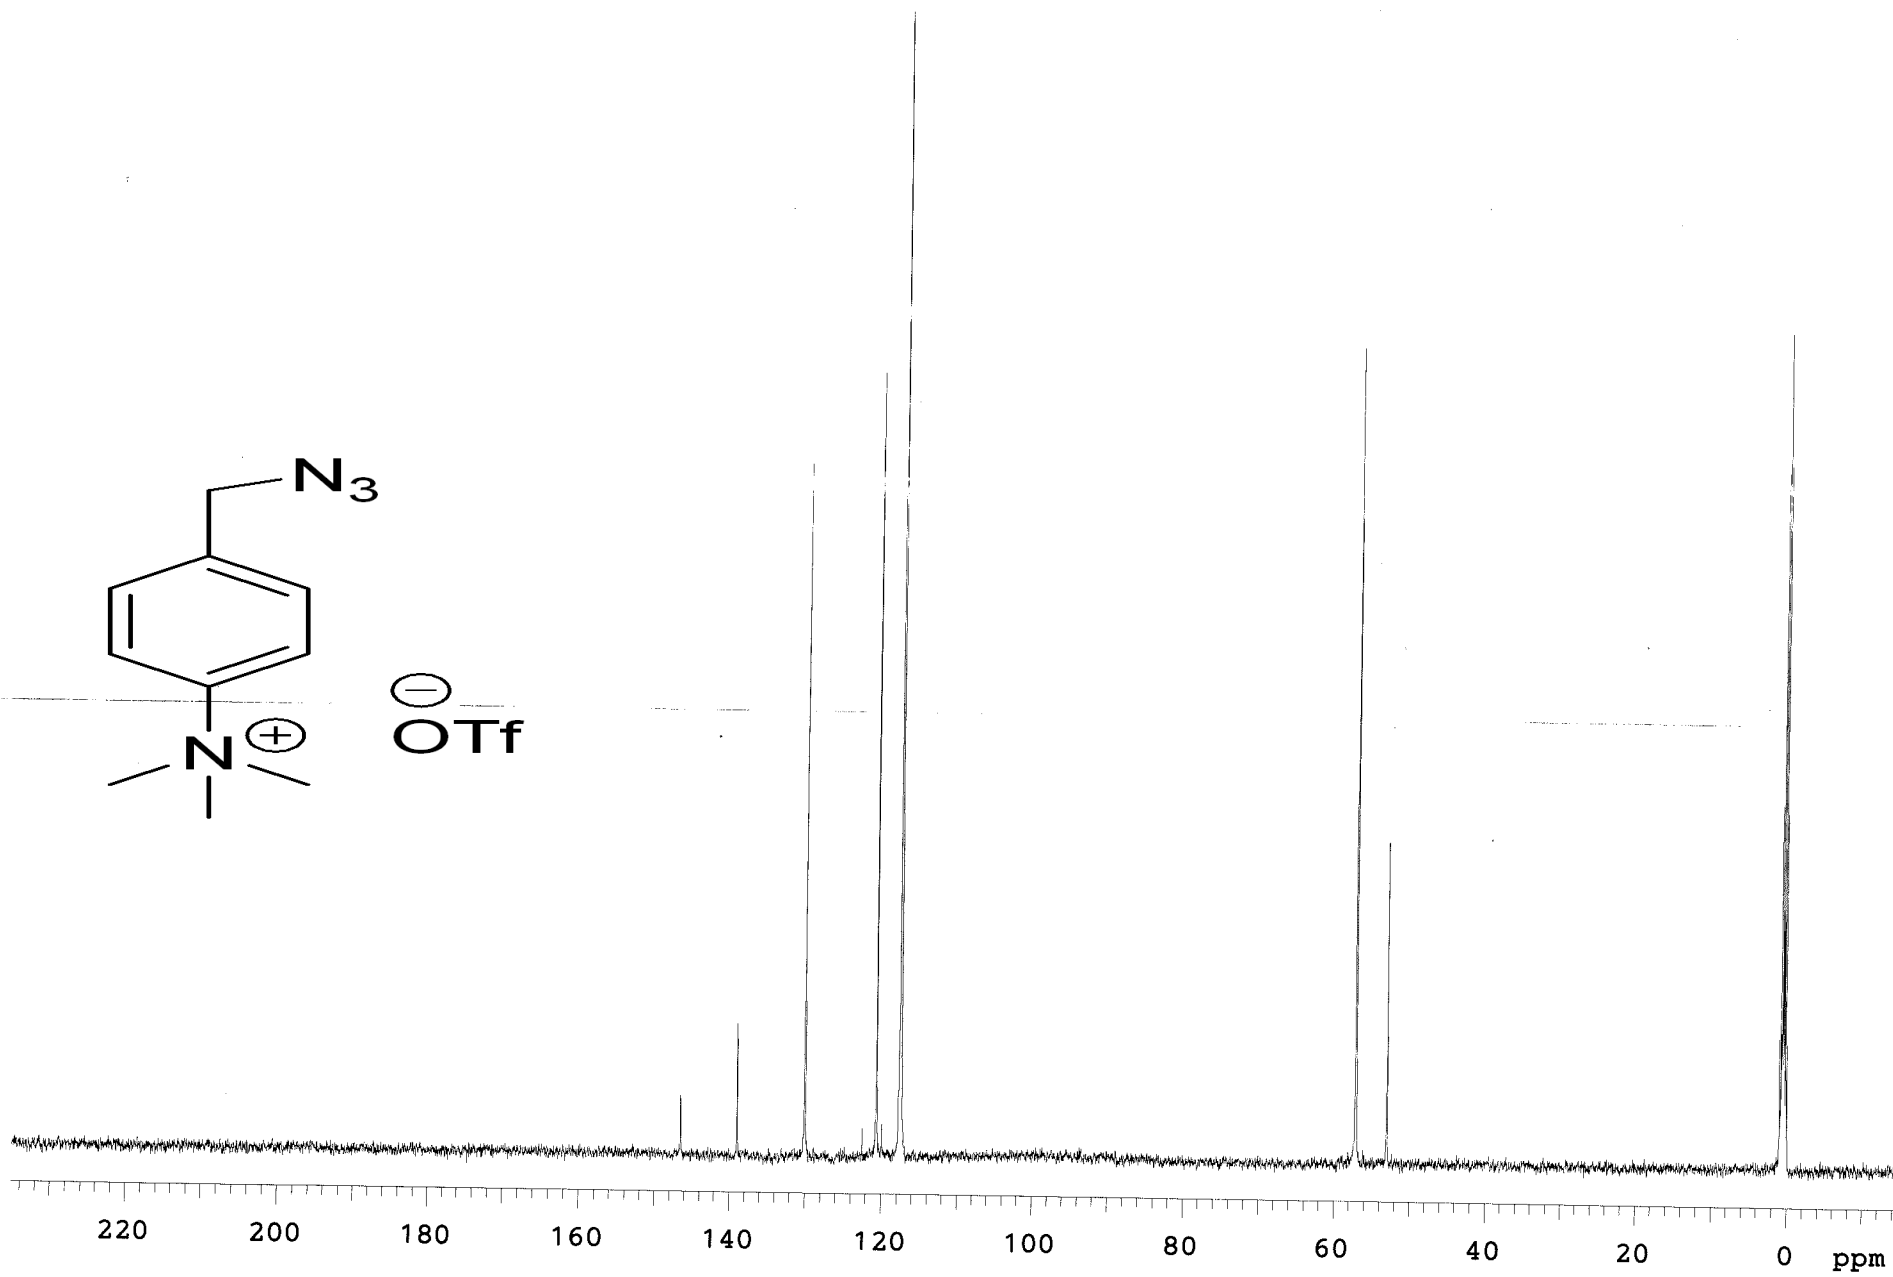

Supplement: c5ob02258d1.pdf [file c5ob02258d1.pdf]
